# Supplementary material
Source: Research Square preprint supplement (doi:10.21203/rs.3.rs-9477422/v1)
Supplement: Supplementary file 1 [file dda7d03053629623ee5e8ab0.docx]

Supporting Information

Synergistic Hydrogen Bonding and Coulomb Force Enhance Electron Transport for Ultrasensitive Ammonia Sensing

Pei-Dong Bao,[a,b,c] Peng Lin,[a] Ke-Feng Li,[a] Jiang-Feng Lu,[a] Xiao-Qing Yu,[a] De-Kai Cai,[a,b,c] Gang Xu*[a] and Guan-E Wang*[a]

[a] State Key Laboratory of Structural Chemistry, Fujian Provincial Key Laboratory of Materials and Techniques toward Hydrogen Energy, Fujian Institute of Research on the Structure of Matter, Chinese Academy of Sciences (CAS), Fuzhou, 350002, China.

[b] Fujian Provincial Key Laboratory of Polymer Materials, College of Chemistry and Materials Science, Fujian Normal University, Fuzhou, 350007, China.

[c] Fujian College, University of Chinese Academy of Sciences, Fuzhou, 350002, China.

Table of Contents

[S1 Experimental Procedures 3](#_Toc227631978)

[S1.1 Time-resolved in-situ DRIFTS spectra collection 3](#_Toc227631979)

[S1.2 Density functional theory (DFT) calculations 3](#_Toc227631980)

[S2 Supporting Figures 4](#_Toc227631981)

[Figure S1. Morphology images of SnATP-NH3+. SEM image of SnATP-NH3+ nanosheets. 4](#_Toc227631982)

[Figure S2. Element distribution (EDS) analysis of SnATP-NH3+. EDS images of SnATP-NH3+ nanosheets. 5](#_Toc227631984)

[Figure S3. X-ray photoelectron spectroscopy (XPS) spectra of N 1s for SnATP-NH3+. 6](#_Toc227631985)

[Figure S4. PXRD patterns of SnATP-NH3+ after immersion in diﬀerent organic solvents for 7 days. 6](#_Toc227631986)

[Figure S5. Band structure diagram of SnATP-NH3+. 7](#_Toc227631987)

[Figure S6. Arrhenius plots of conductivity for SnATP-NH3+ under dry air. 7](#_Toc227631988)

[Figure S7. Fabrication process of the SnATP-NH3+ based sensor. 8](#_Toc227631989)

[Figure S8. Gas sensing test system. Diagram of the homemade gas sensing test system. 8](#_Toc227631990)

[Figure S9. Scanning Electron Microscopy (SEM) of SnATP-NH2. 9](#_Toc227631991)

[Figure S10. Powder X-ray diffraction (PXRD) pattern of SnATP-NH2. 9](#_Toc227631992)

[Figure S11. Element distribution (EDS) analysis of SnATP-NH2. EDS images of SnATP-NH2. 10](#_Toc227631993)

[Figure S12. Infrared characterization. Fourier-transform Infrared (FTIR) spectra of SnATP-NH2 and 4-Aminothiophenol. 11](#_Toc227631994)

[Figure S13. Thermogravimetric analysis (TG) of SnATP-NH2. TG curve of SnATP-NH2. 11](#_Toc227631995)

[Figure S14. PXRD patterns of SnATP-NH2after immersion in diﬀerent organic solvents for 7 days. 12](#_Toc227631996)

[Figure S15. Fabrication process of the SnATP-NH2 based sensor. 12](#_Toc227631997)

[Figure S16. Cross-sensitivities of SnATP-NH2 molecular-based material towards 13 types of gases. 13](#_Toc227631998)

[Figure S17. DFT calculation of NH3 adsorption on the zero-dimensional molecular material SnATP-NH3+. 14](#_Toc227631999)

[S3 Supporting Tables 15](#_Toc227632000)

[Table S1. Crystallographic data for SnATP-NH3+. 15](#_Toc227632001)

[Table S2. Crystallographic data for SnATP-NH2 16](#_Toc227632002)

[Table S3. Sensing performance of the no-light irradiation material-based RT chemiresistive NH3 sensors. 17](#_Toc227632003)

S1 Experimental Procedures

**S1.1 Time-resolved in-situ DRIFTS spectra collection**

DRIFTS spectra were collected on a Nicolet 6700 FT-IR spectrometer with MCT/A detector cooled by liquid nitrogen. The spectra were displayed in absorbance units and acquired with a resolution of 4 cm-1 using 128 scans. To monitor the real test condition, all the spectra were collected under synthetic air (79% nitrogen, 21% oxygen). Data collection was performed on OMNIC software. The powder of SnATP-NH3+ nanosheets was heated to 85 °C under the high-purity Ar flow at a rate of 200 mL/min for 2 h. Then a spectrum of the pristine sample was collected using the aforementioned KBr background. Then under the lifted temperature synthetic air was introduced at a rate of 100 mL/min. Difference spectra were collected every 15 min continuously for 150 min. All spectra were obtained by 128 scans with a resolution of 4 cm-1 from 650 to 4000 cm-1

**S1.2 Density functional theory (DFT) calculations**

DFT calculations were carried out to investigate the adsorption interaction between NH3 molecules and SnATP-NH3+ nanosheets, employing the VASP. The GGA parameterized with the PBE exchange-correlation function were used for all geometry optimizations and electron density difference calculations. A plane-wave cutoff energy of 400 eV was set. Geometry optimizations were considered converged when the energy and force thresholds reached 1 × 10-4 eV per atom and 0.03 eV Å–1, respectively. A 1×4×3 k-point mesh was used for Brillouin zone sampling.

The crystal structure of SnATP-NH3+ was optimized prior to constructing the adsorption model. Based on the optimized crystal structure, a surface slab model was created by cleaving along the (100) crystal plane. To eliminate spurious interactions between periodic images, a vacuum spacing of 15 Å was applied along the surface normal direction. The surface of the slab is decorated with both amino (-NH2) and ammonium chloride (-NH3+/Cl-) functional groups, with the latter originating from the partial protonation of the former. The SnATP-NH3+ nanosheet model underwent full relaxation through additional geometry optimization. The adsorption energy of NH3 on the surface of the SnATP-NH3+ slab model and the electron density difference after adsorption were calculated. To visualize the electron transfer following gas adsorption, electron density difference calculations were performed on two atom sets: one representing the SnATP-NH3+ and the other representing the gas molecule. The number of electrons transferred from SnATP-NH3+ to gas molecule was obtained by Bader charge calculation. The adsorption energies were calculated by the following formula:

Eads = Eab – (Ea + Eb)

Eab the total energy of the slab model with the adsorbed gas molecule, Ea is the energy of the pristine slab model, and Eb is the energy of the isolated gas molecule.

**S2 Supporting Figures**


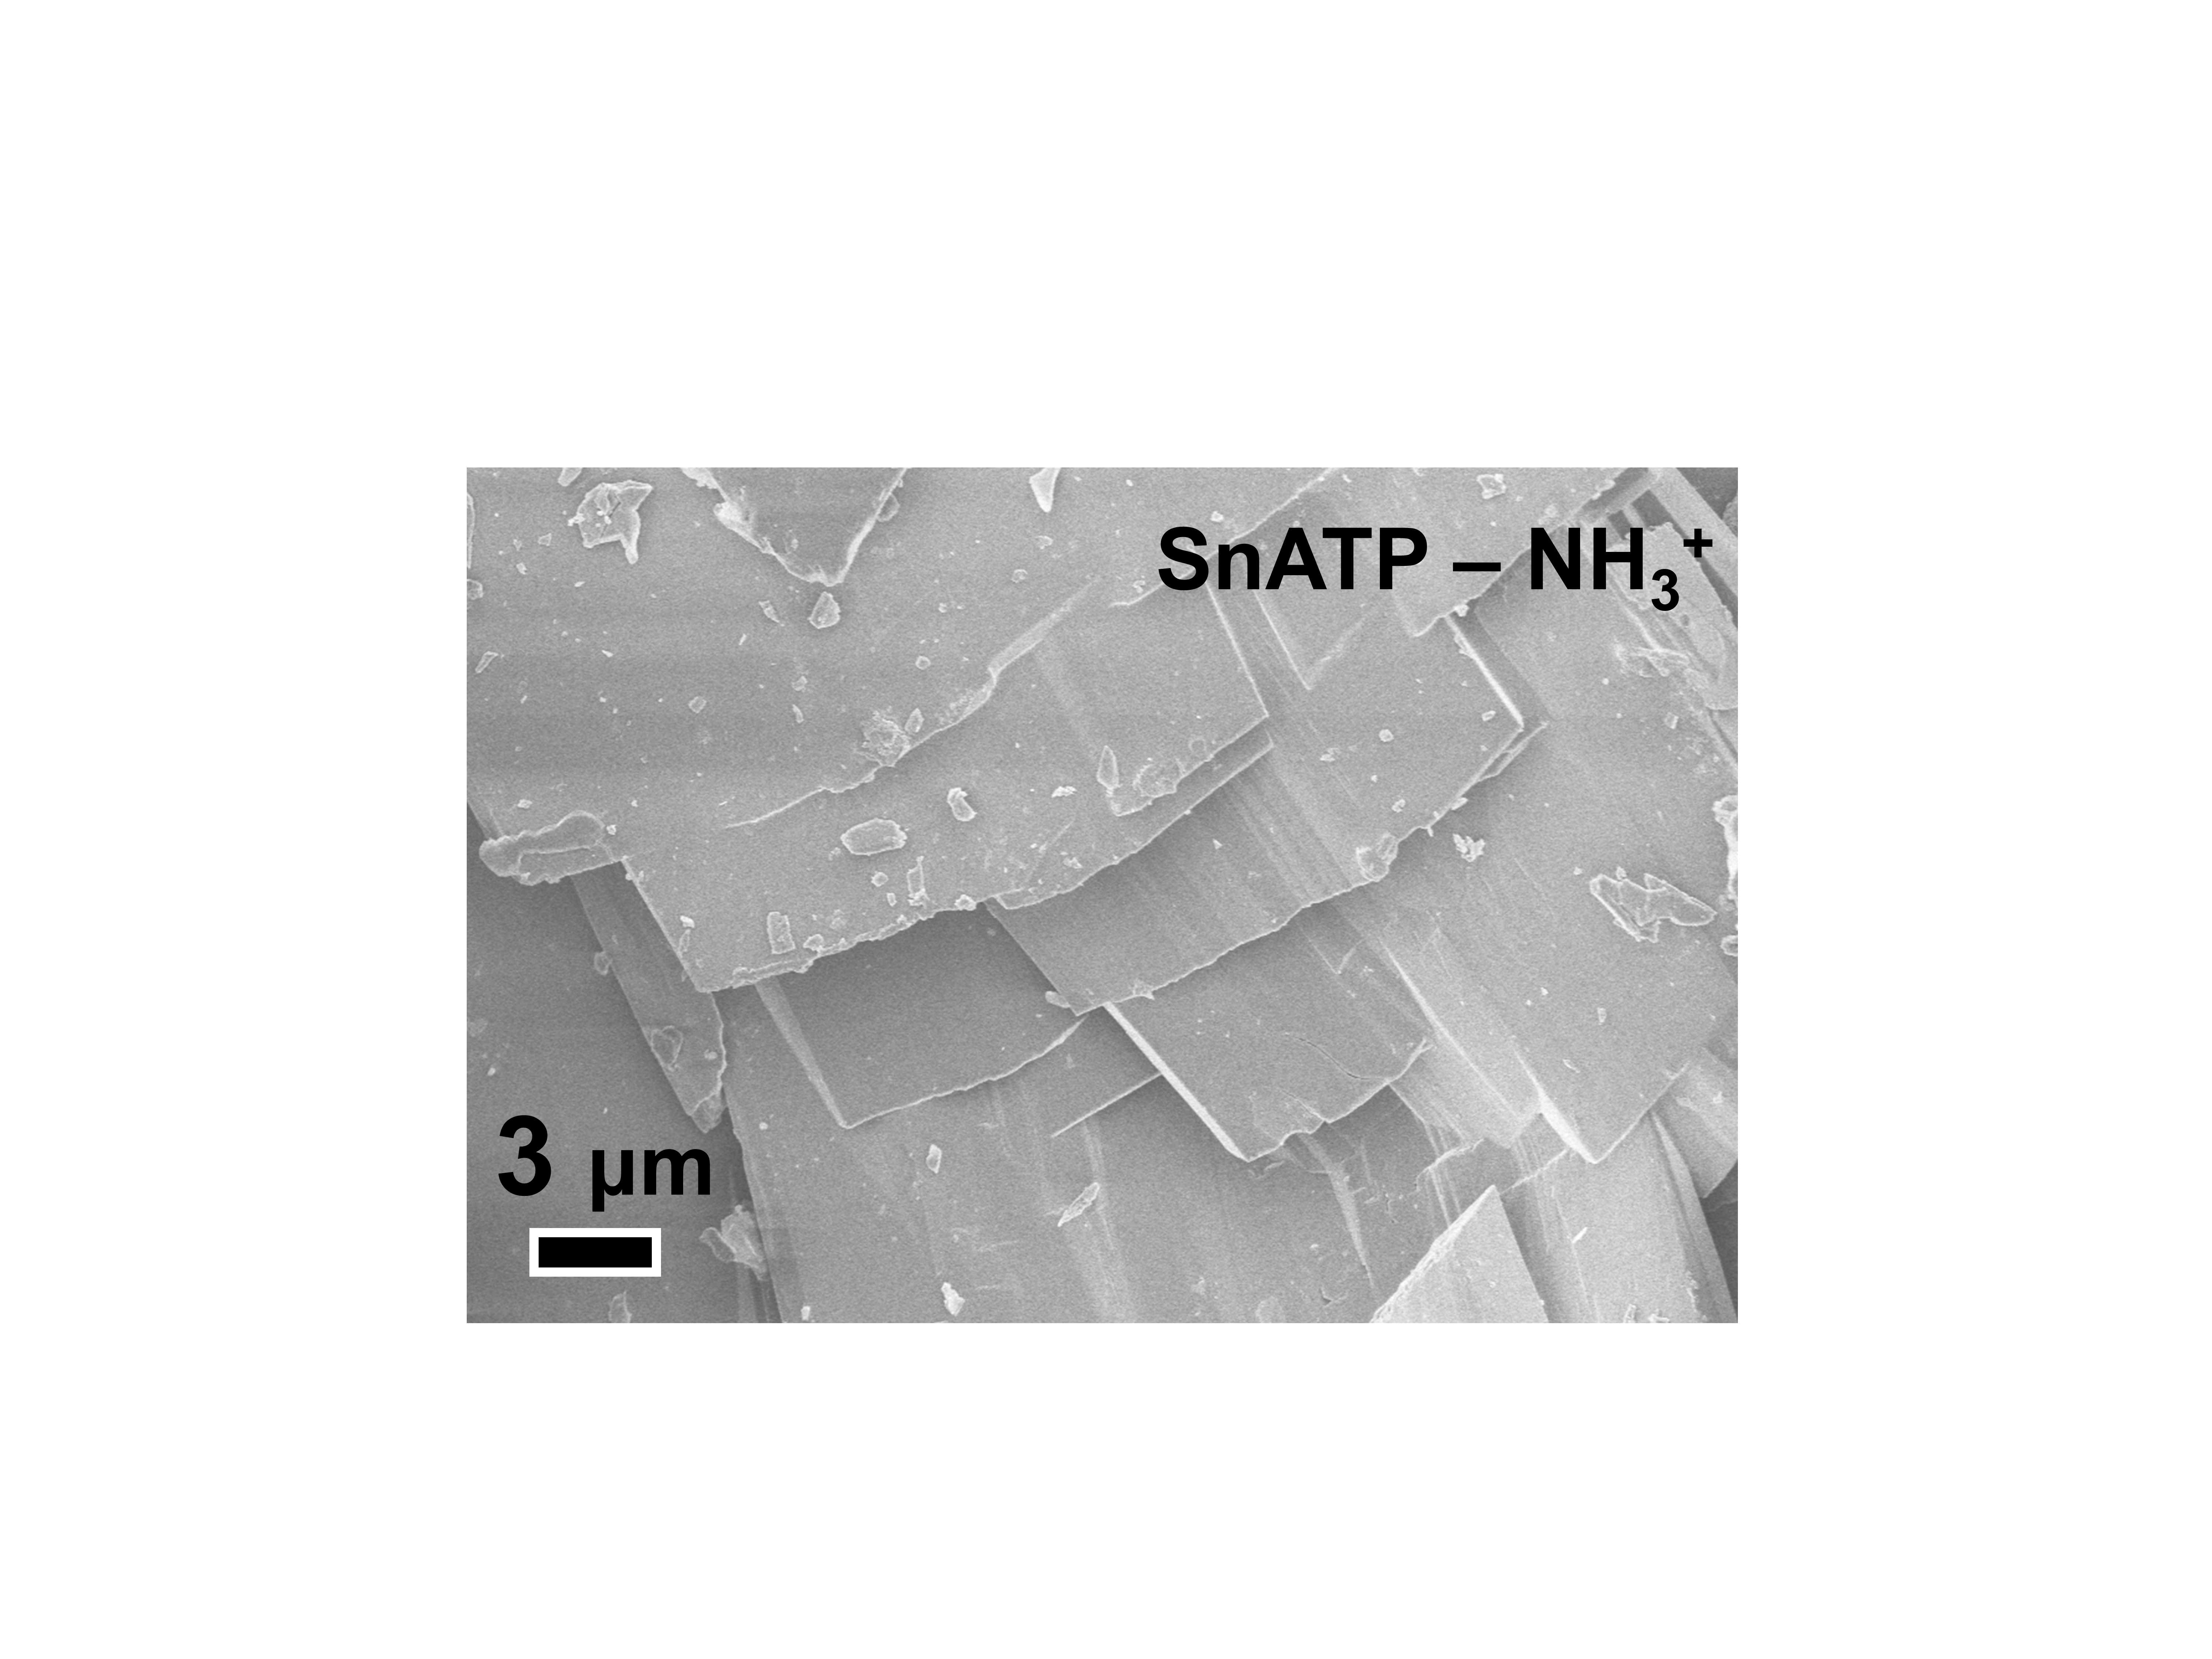


**Figure S1.** Morphology images of SnATP-NH3+. SEM image of SnATP-NH3+ nanosheets.

**
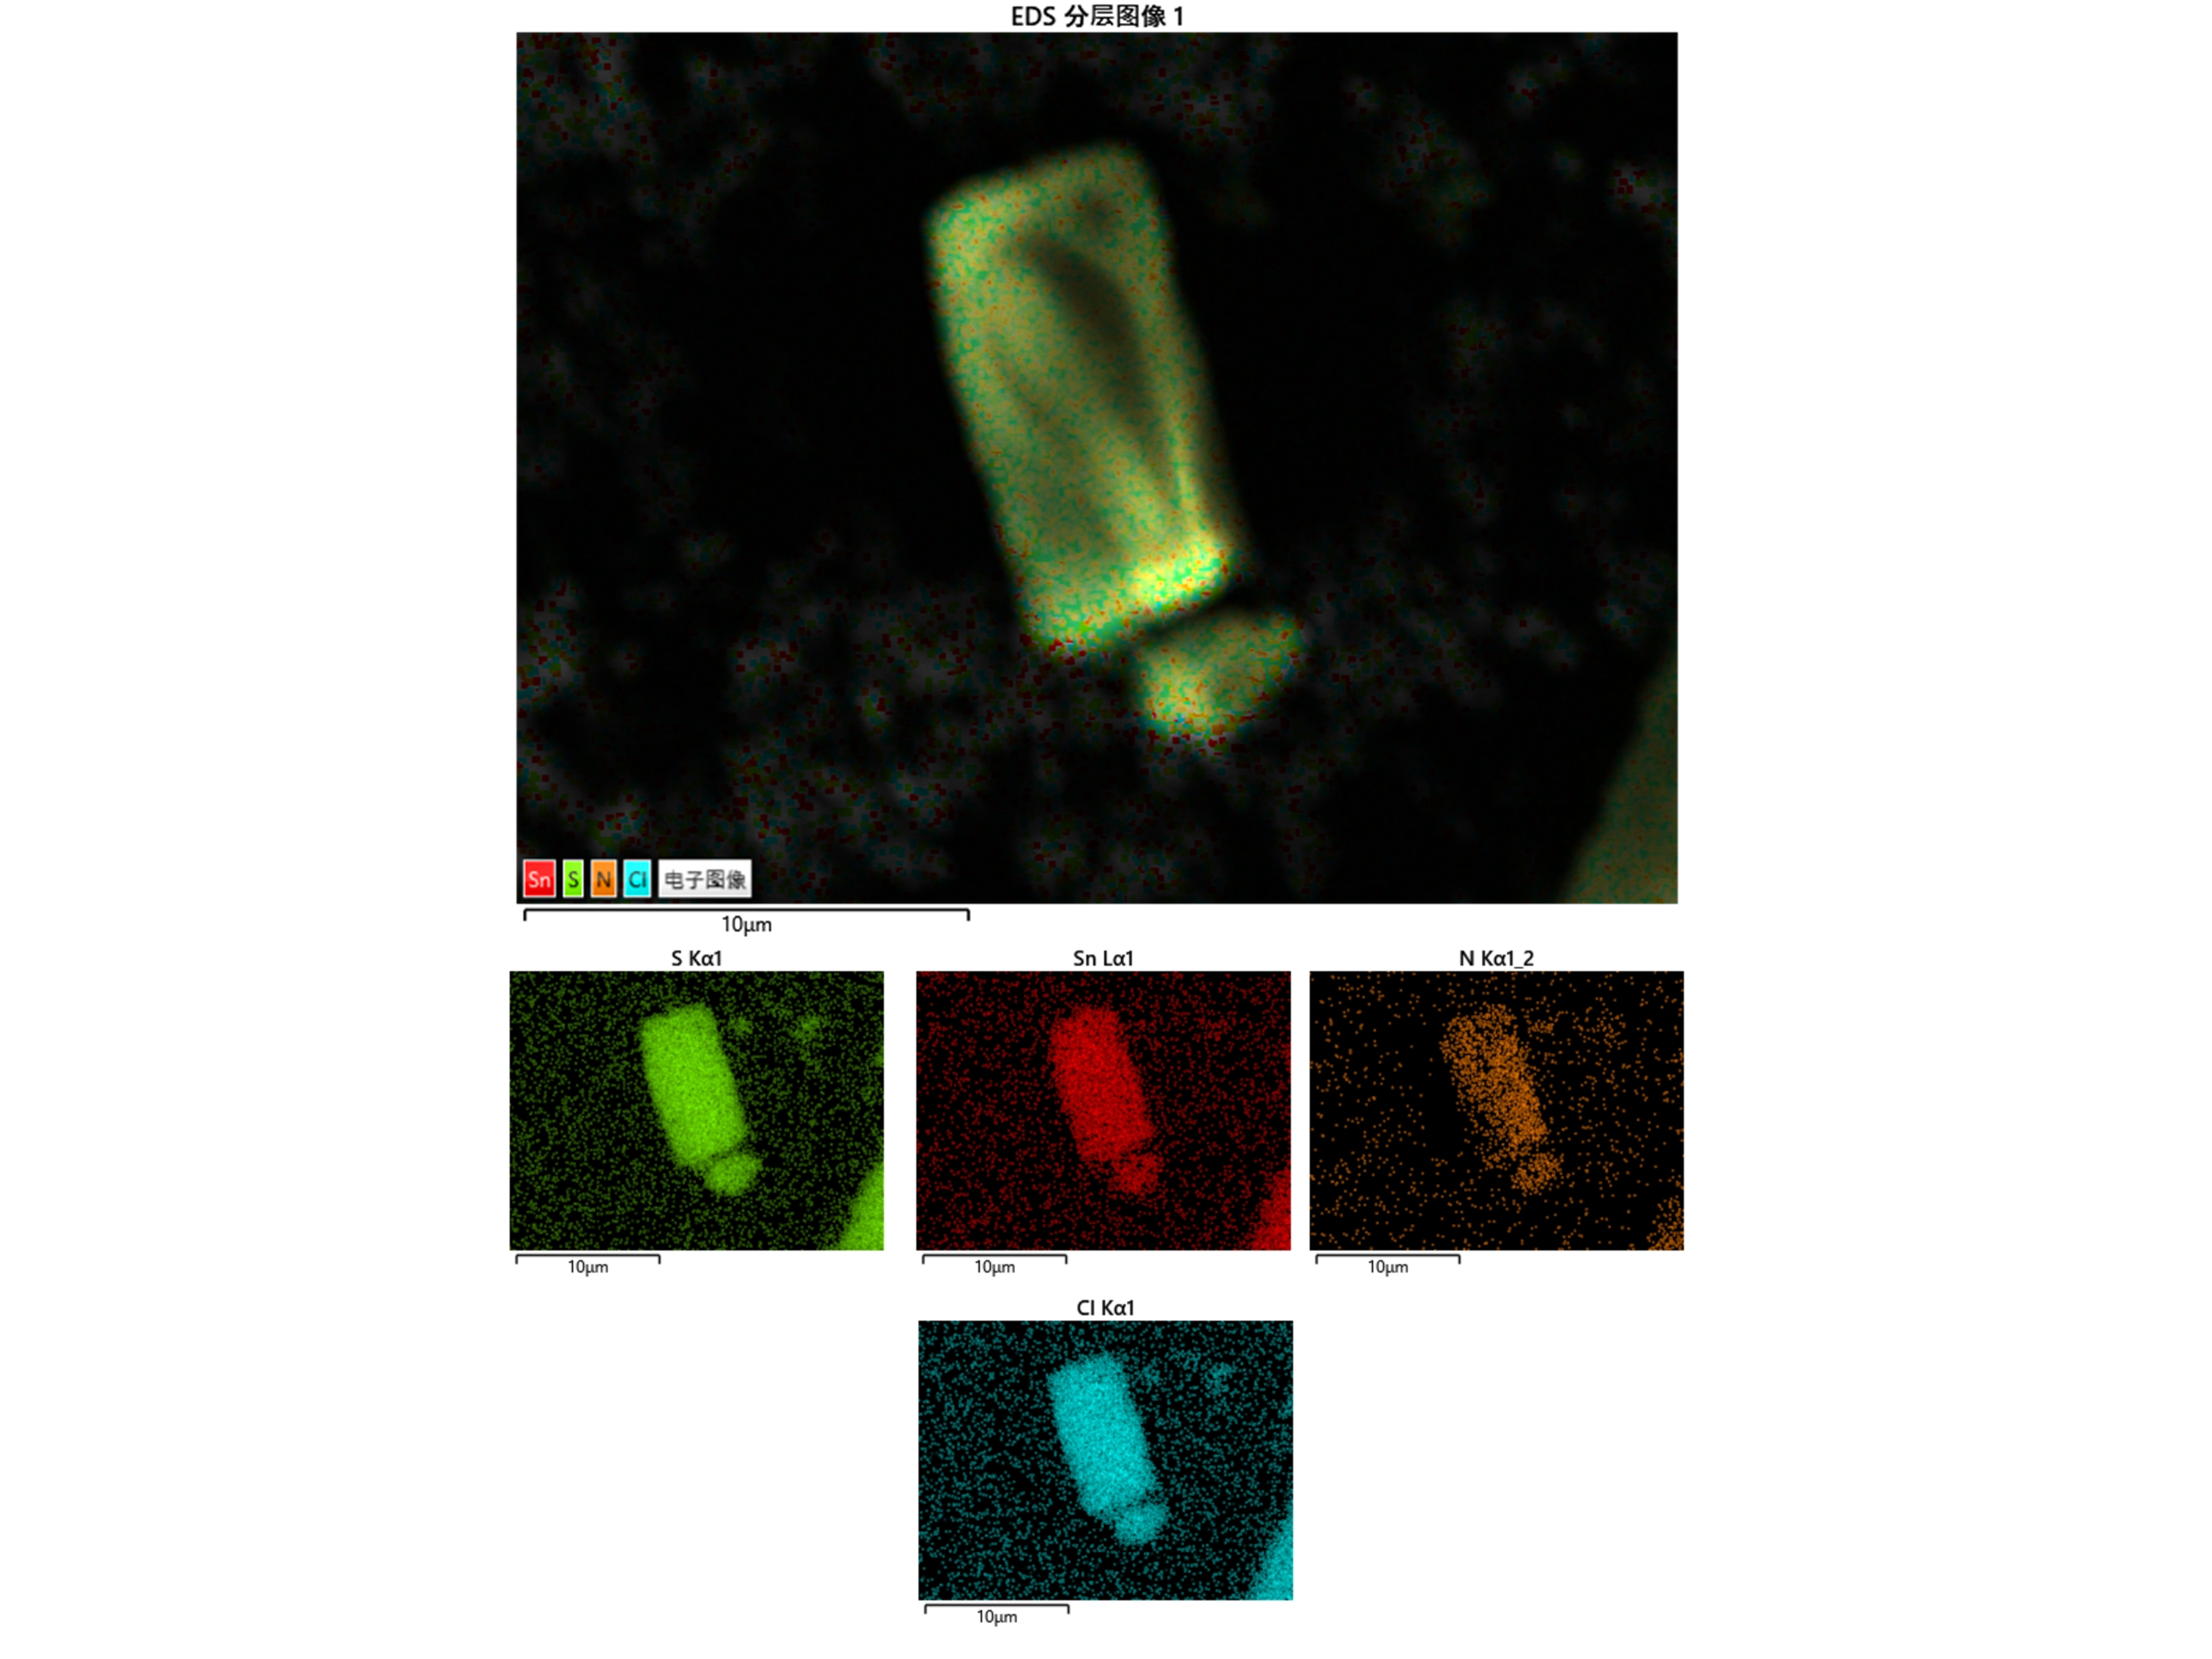
**

**Figure S2.** Element distribution (EDS) analysis of SnATP-NH3+. EDS images of SnATP-NH3+ nanosheets.


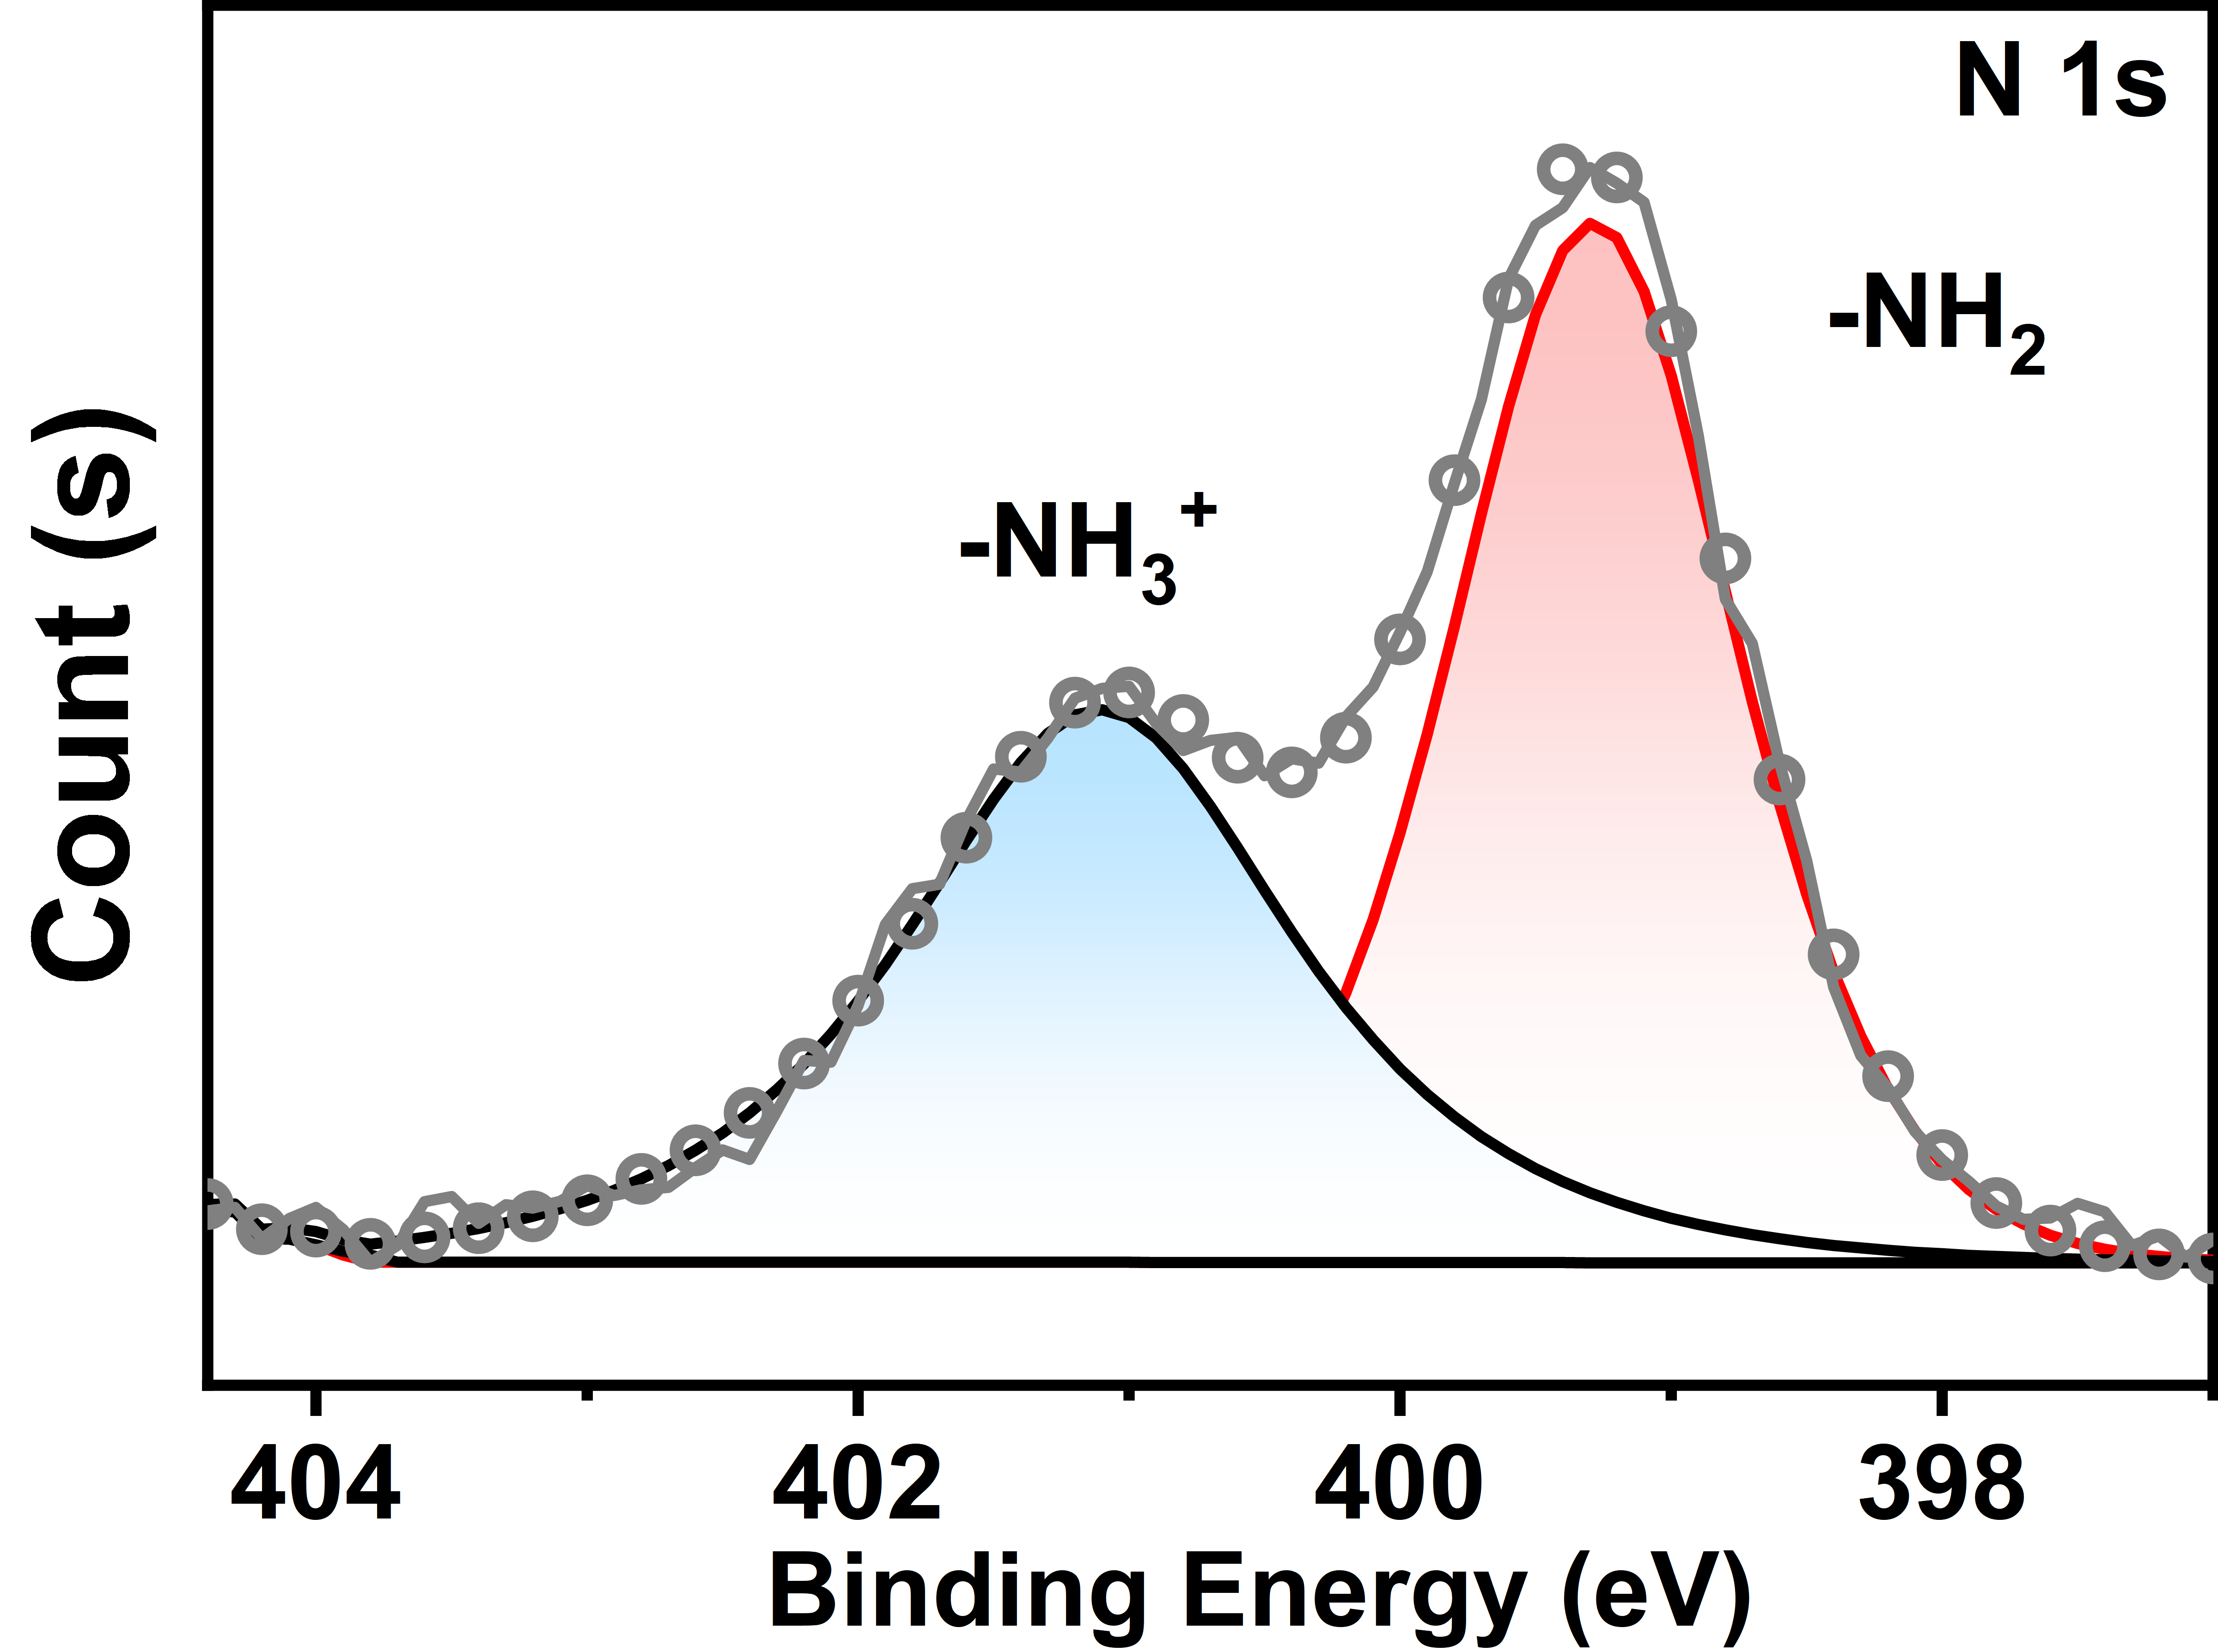


**Figure S3.** X-ray photoelectron spectroscopy (XPS) spectra of N 1s for SnATP-NH3+.


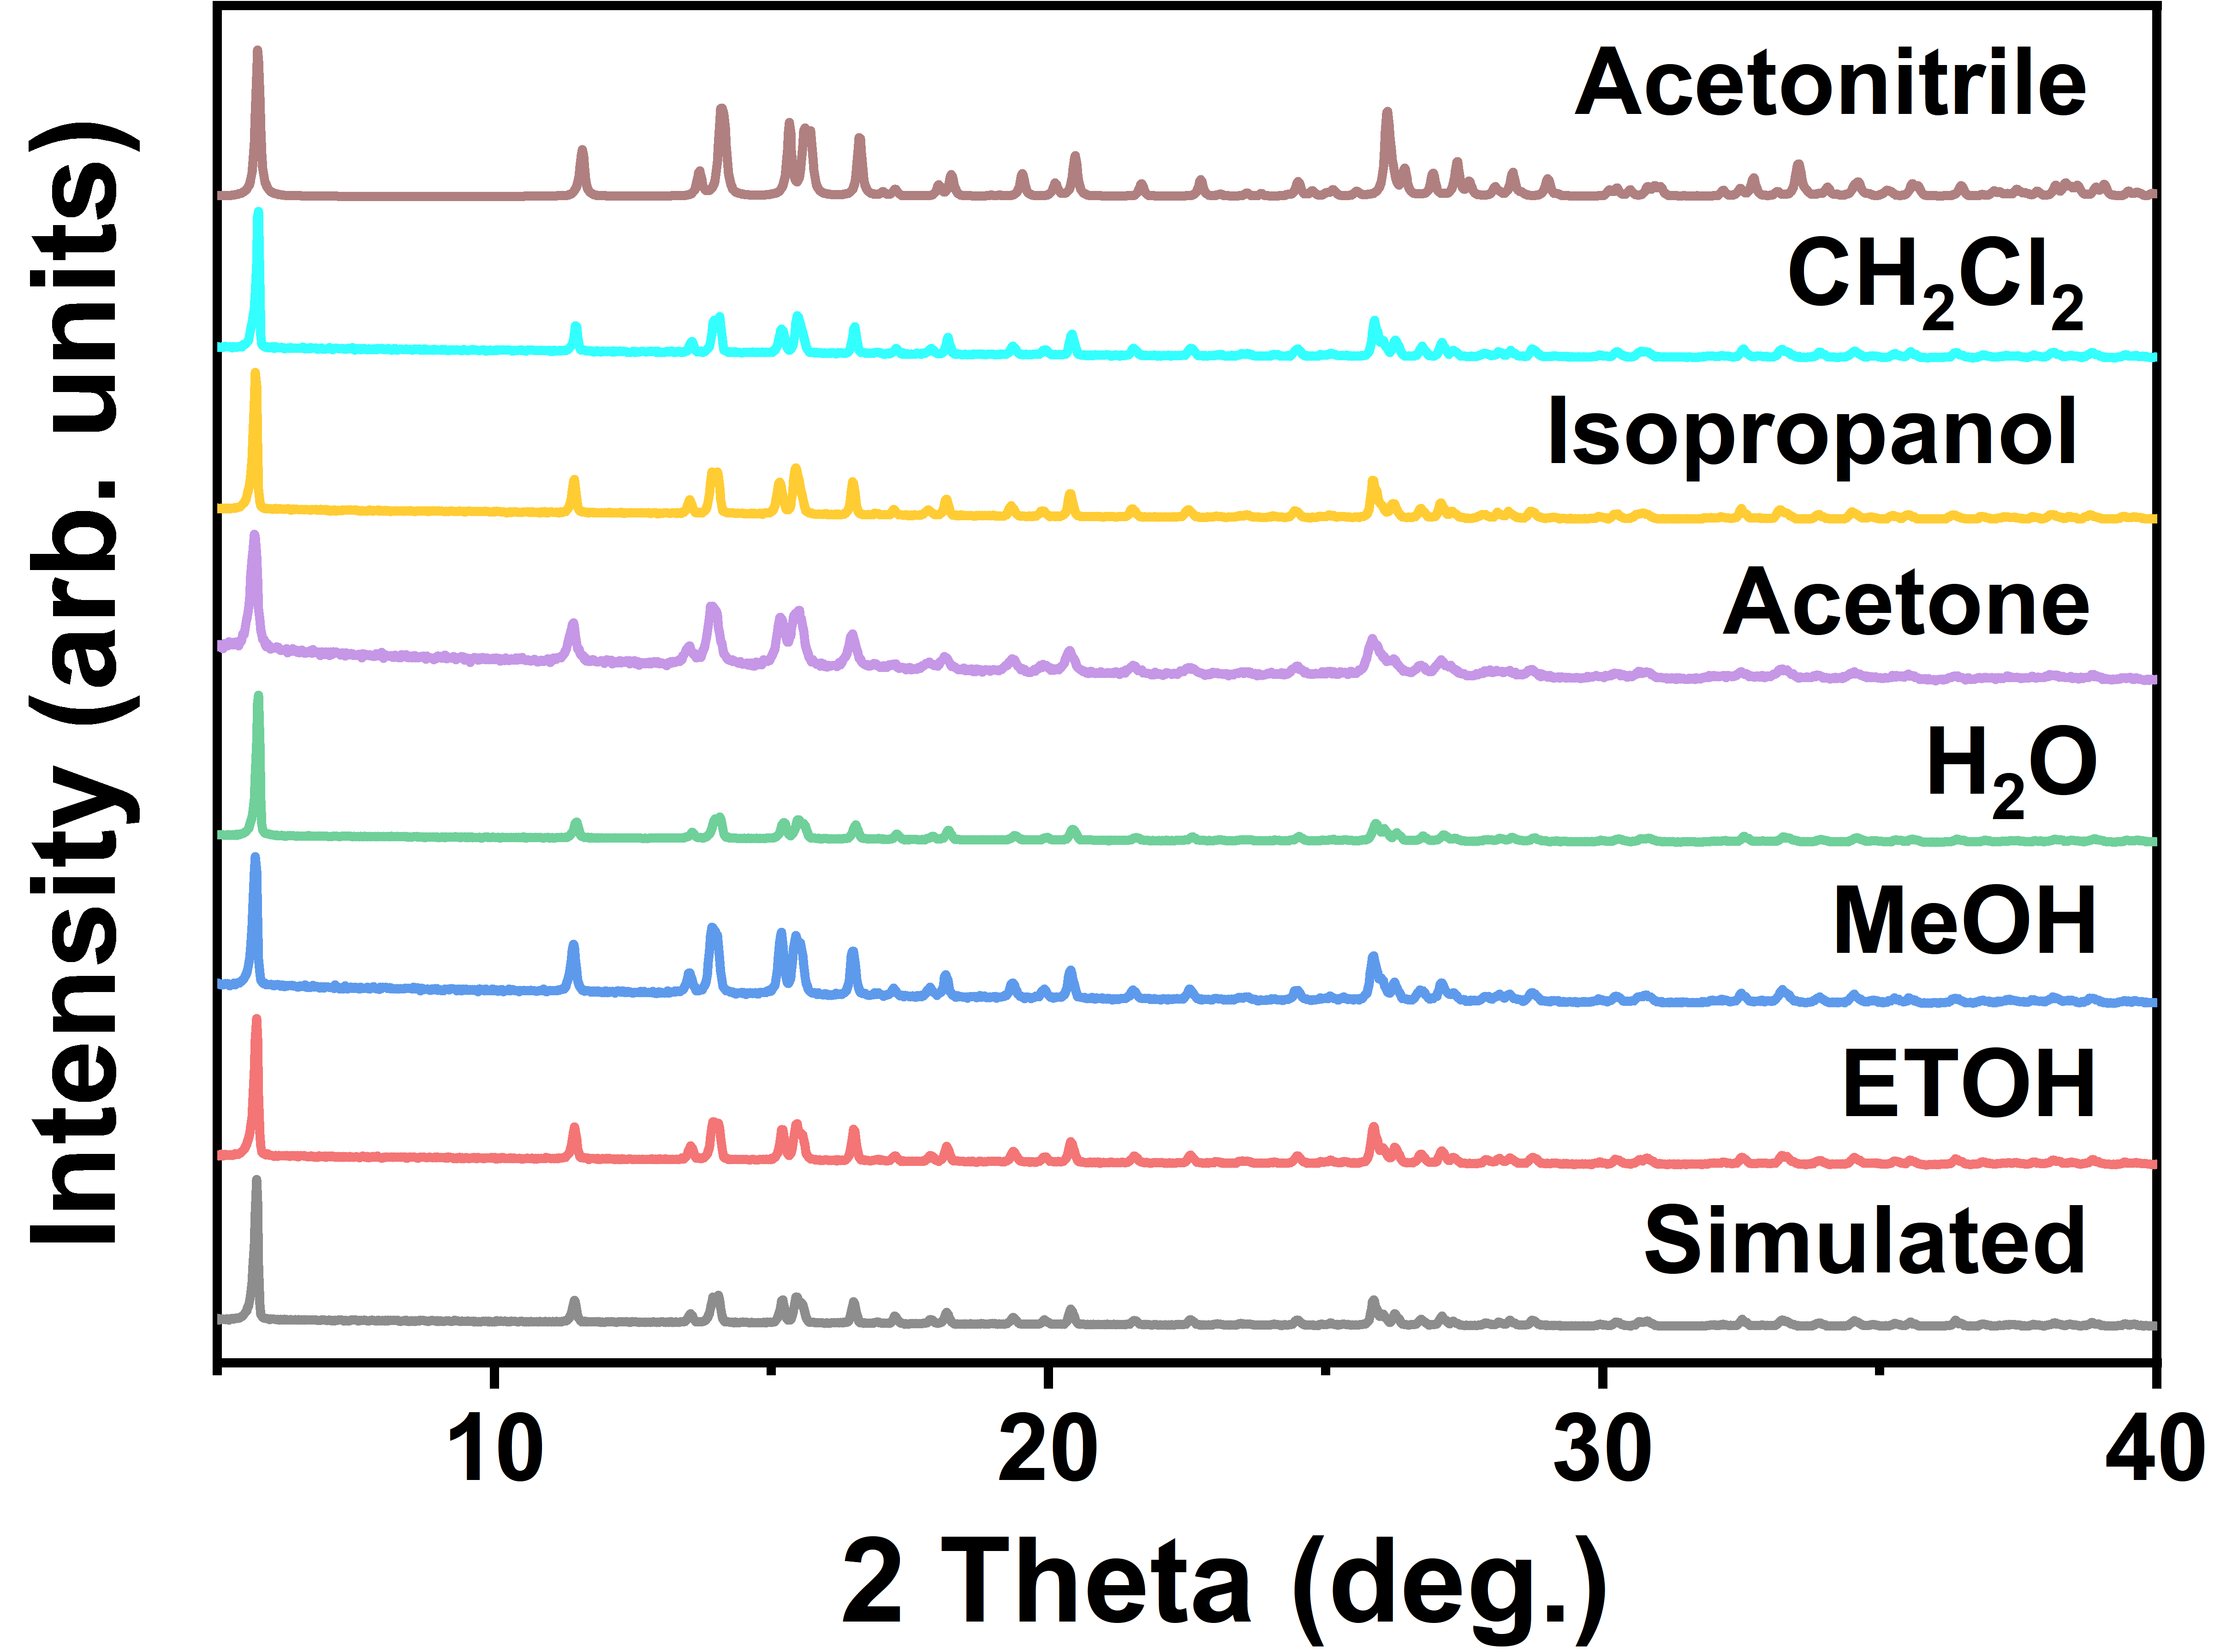


**Figure S4.** PXRD patterns of SnATP-NH3+ after immersion in diﬀerent organic solvents for 7 days.


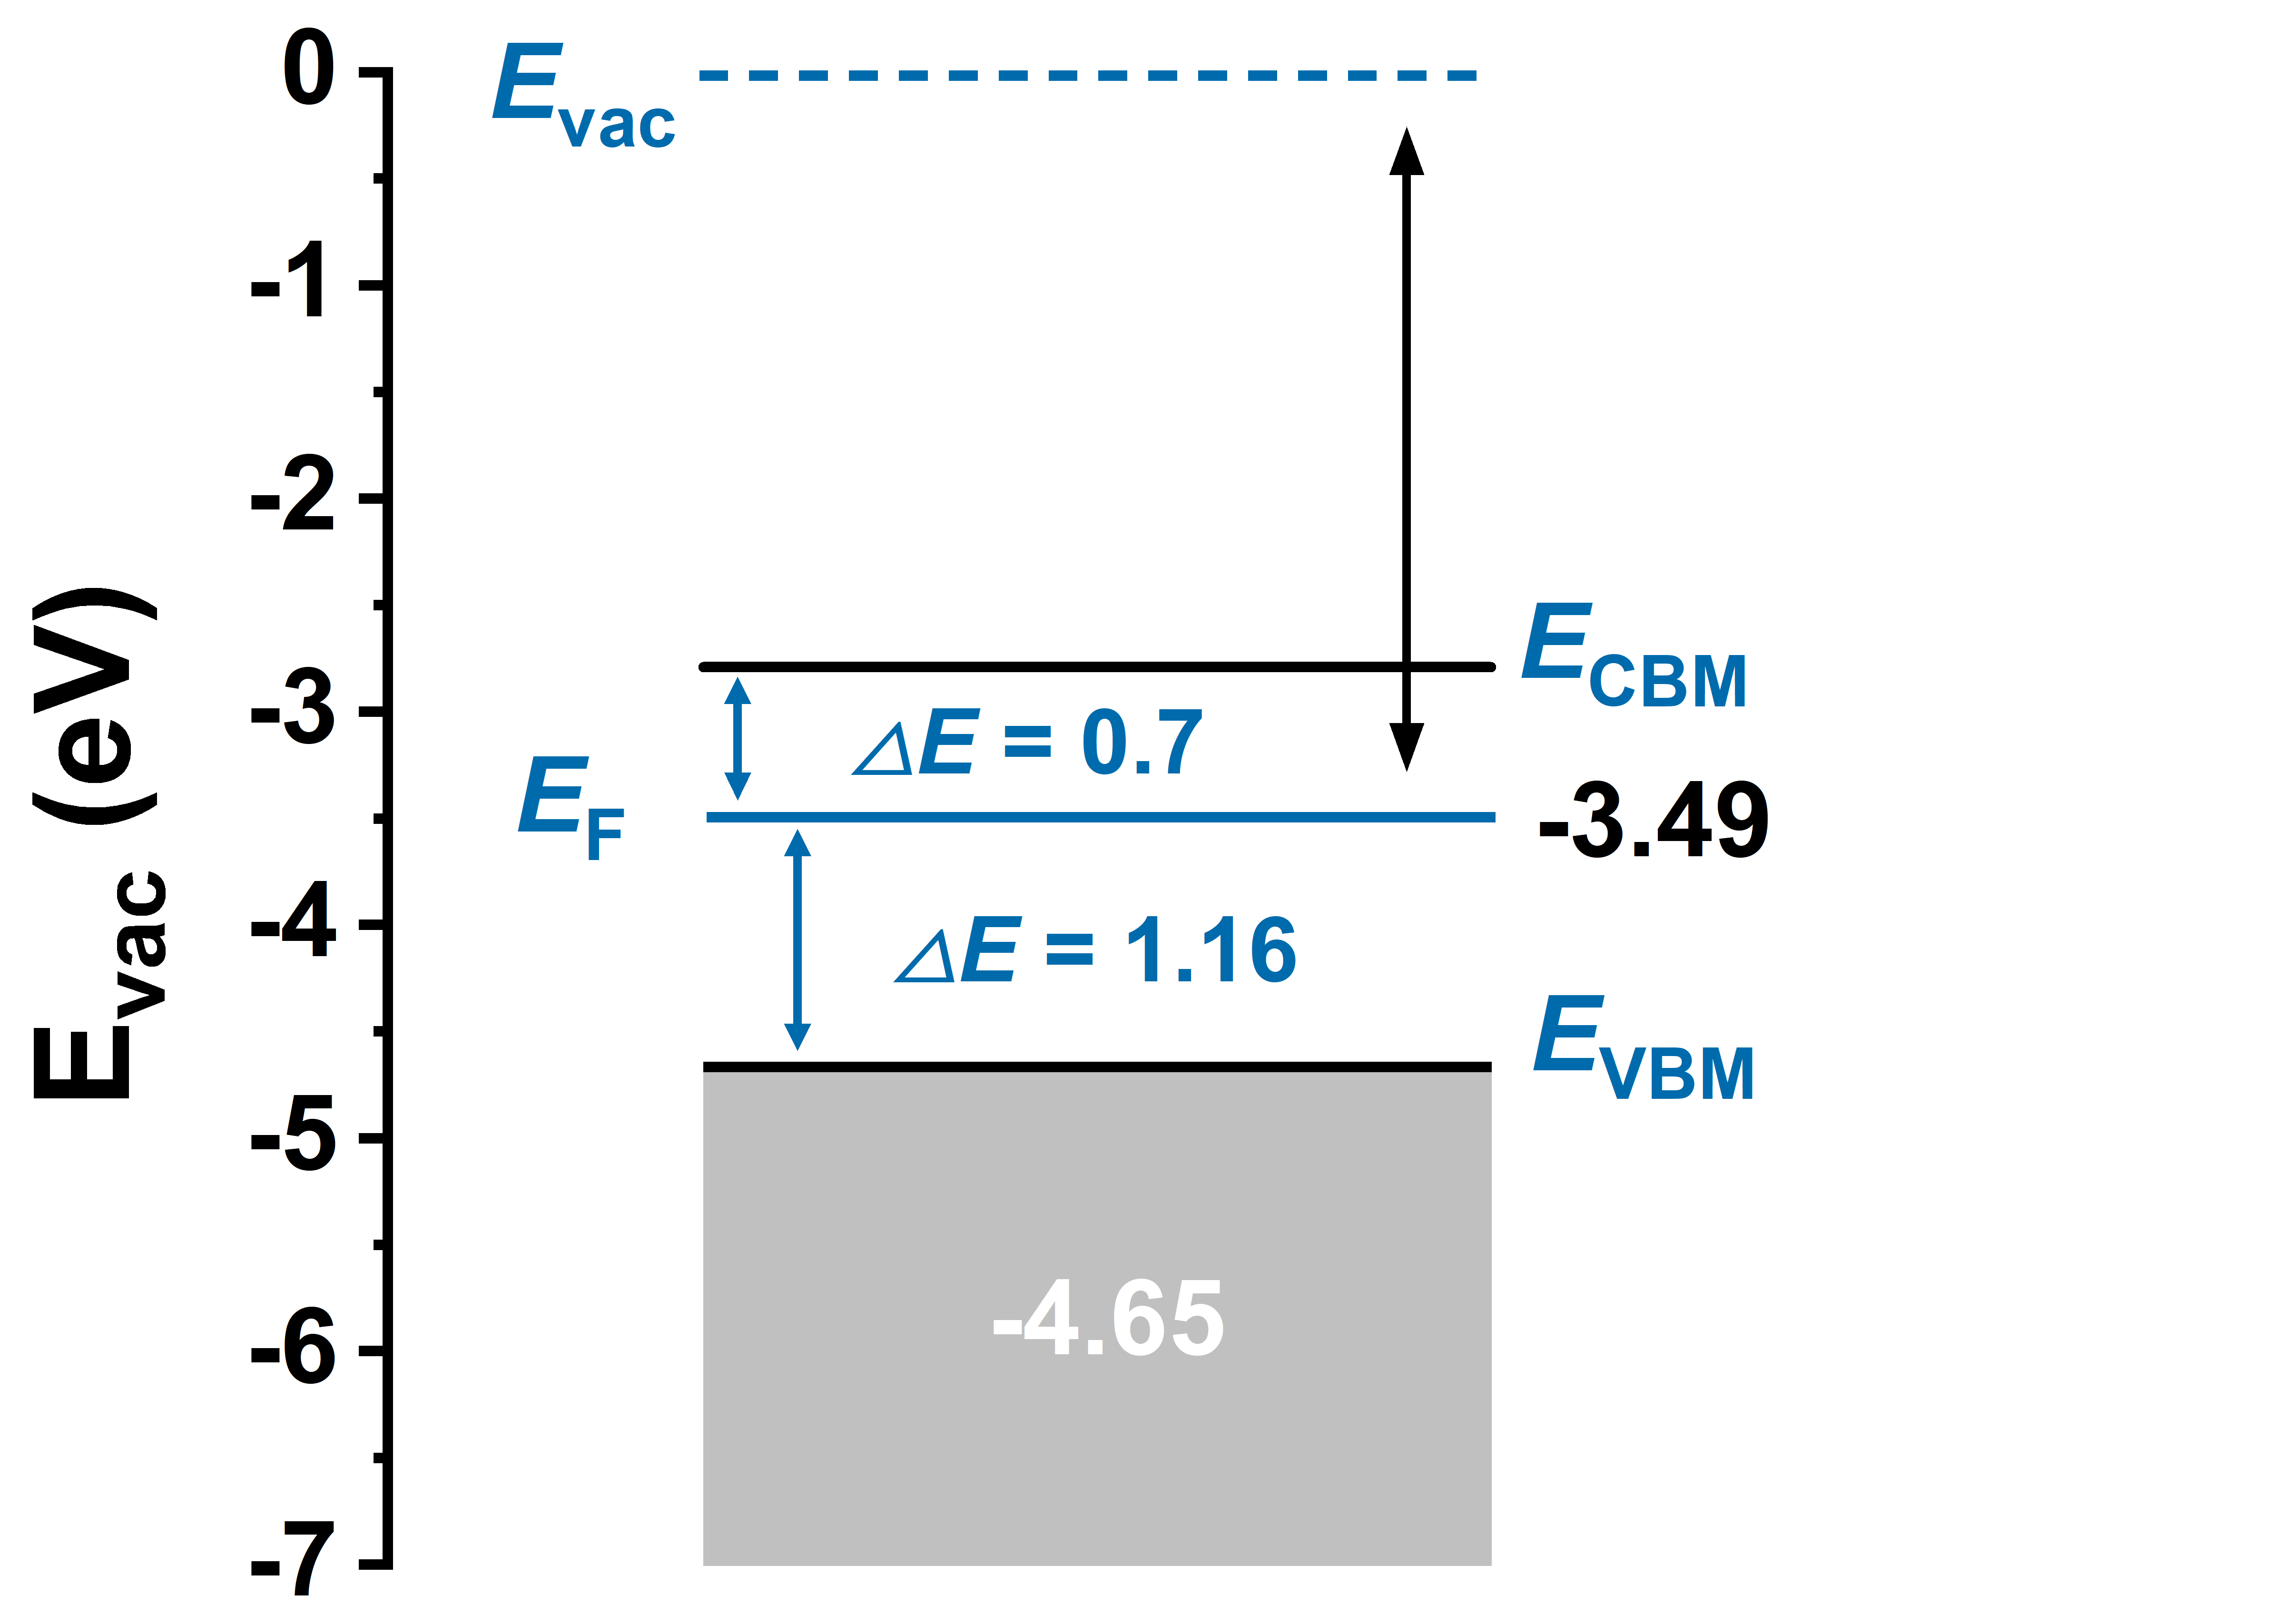


**Figure S5.** Band structure diagram of SnATP-NH3+.


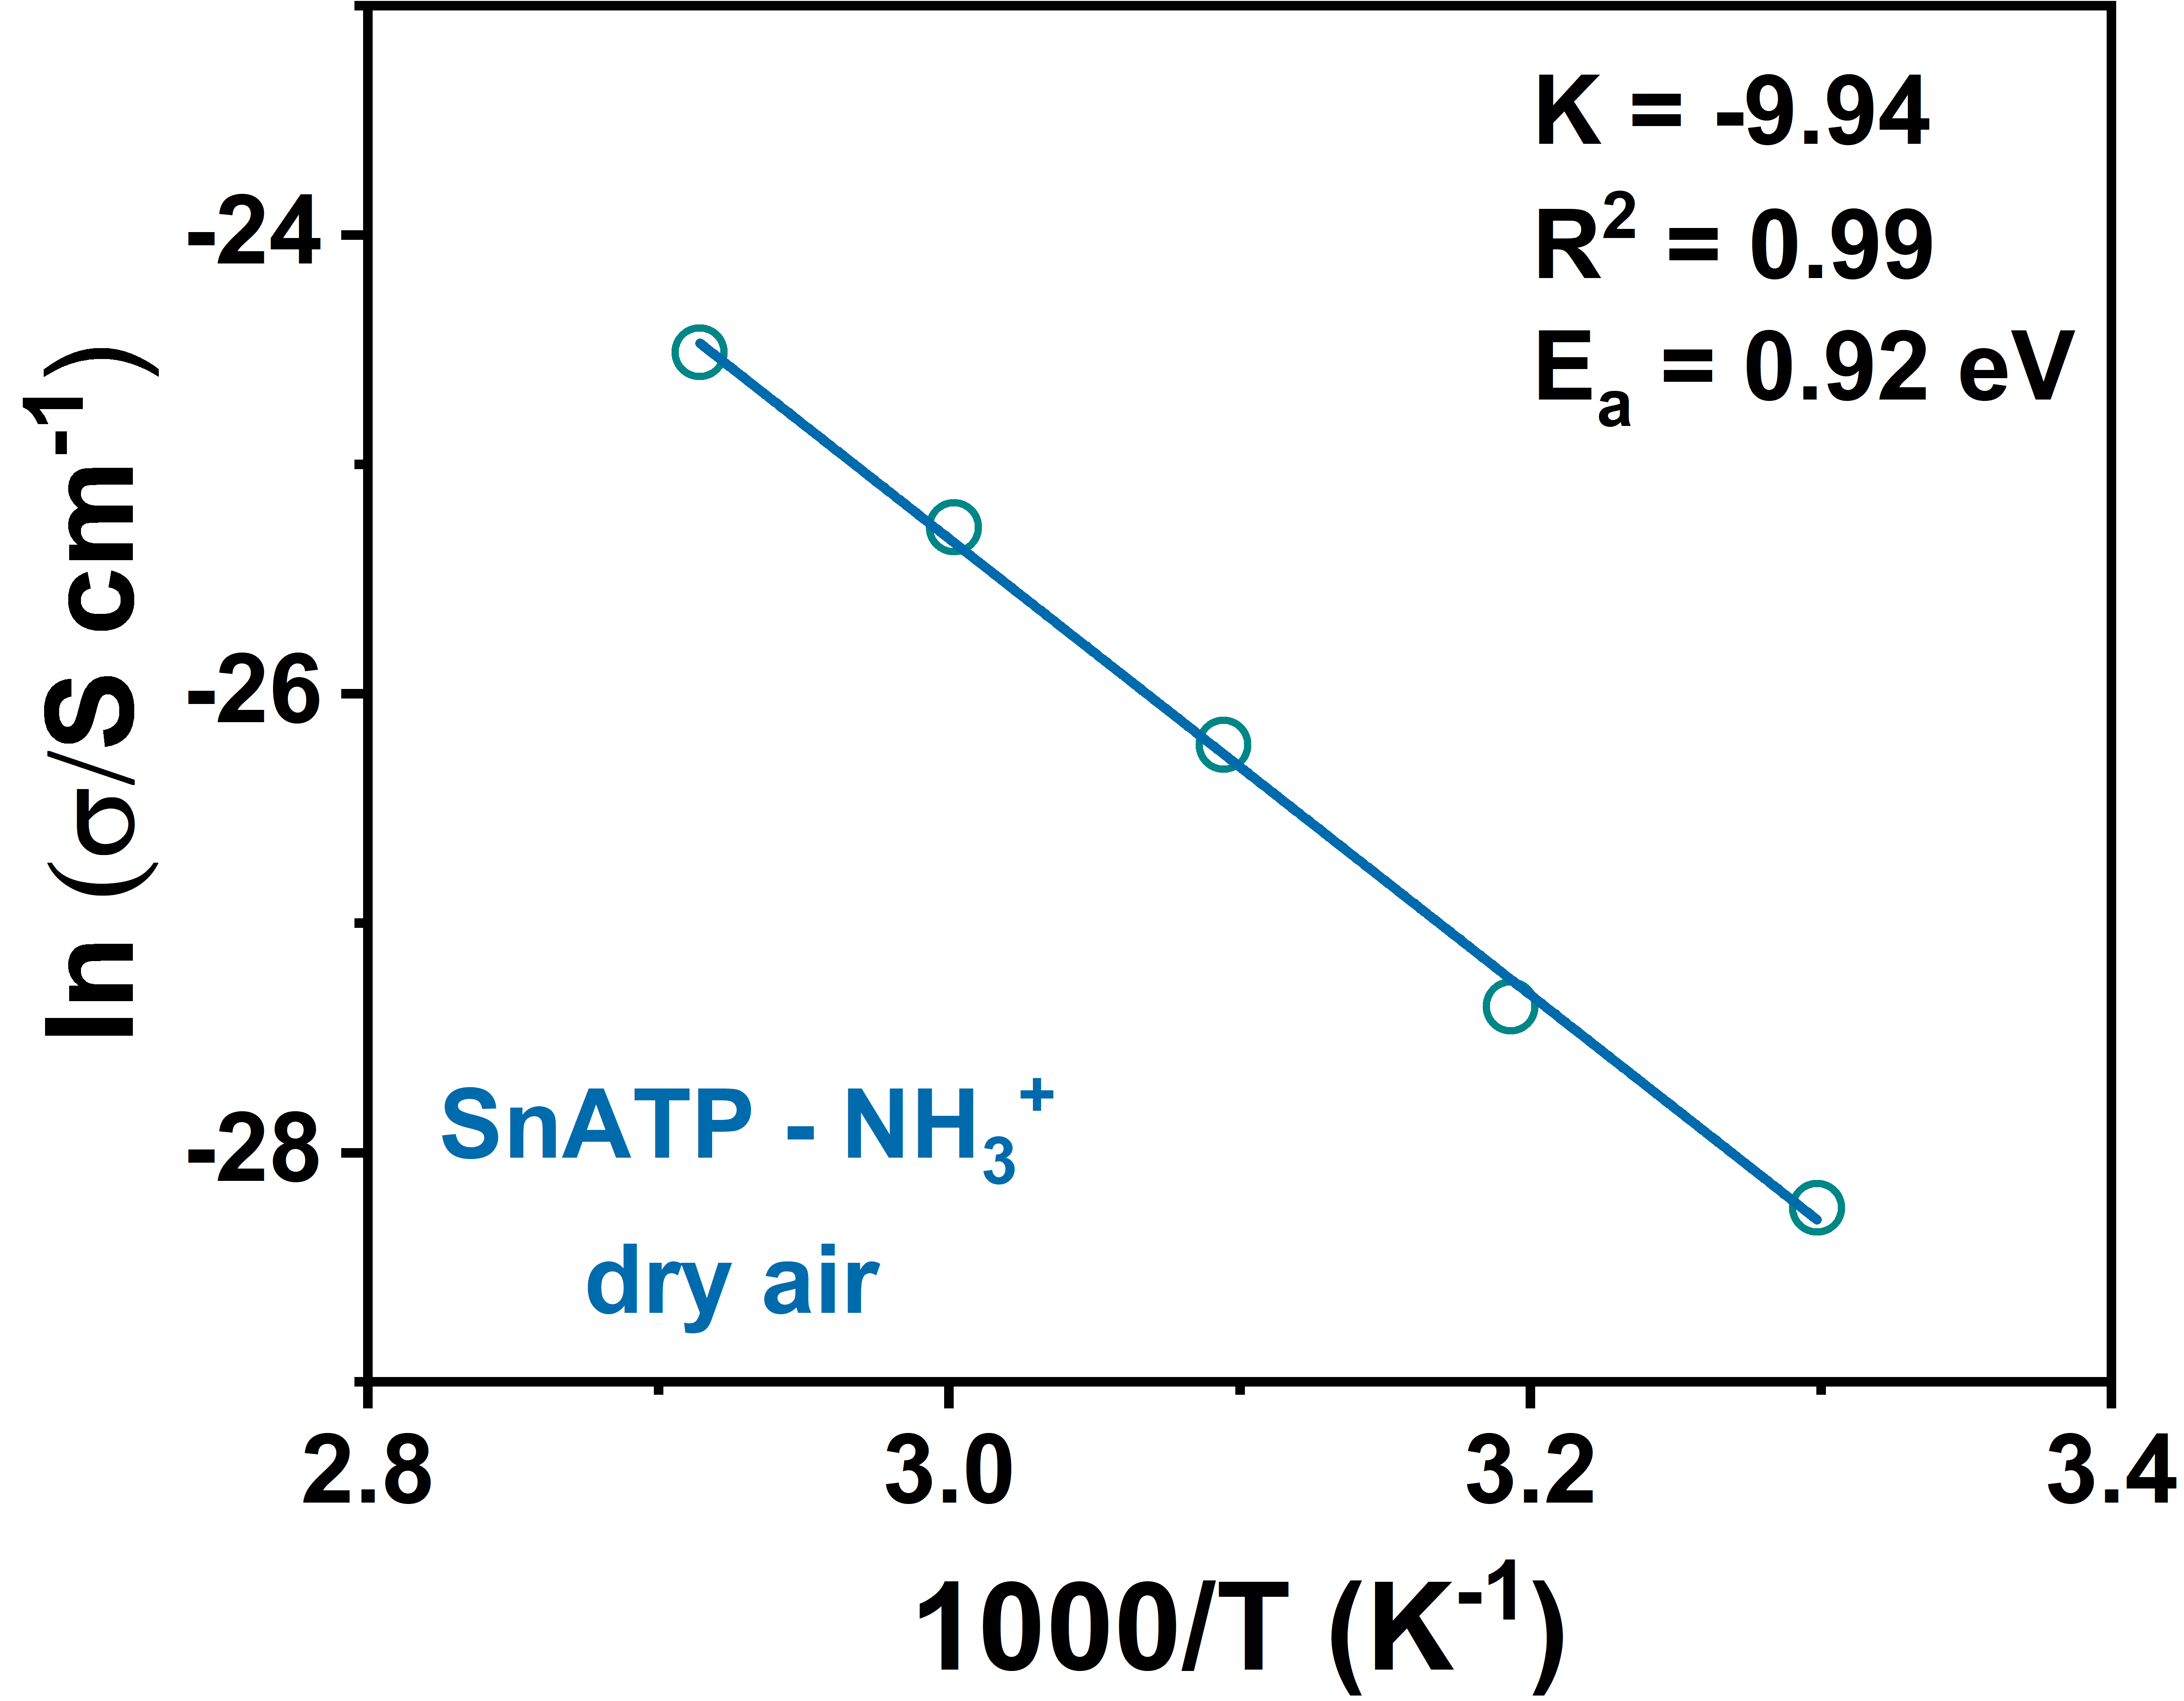


**Figure S6.** Arrhenius plots of conductivity for SnATP-NH3+ under dry air.


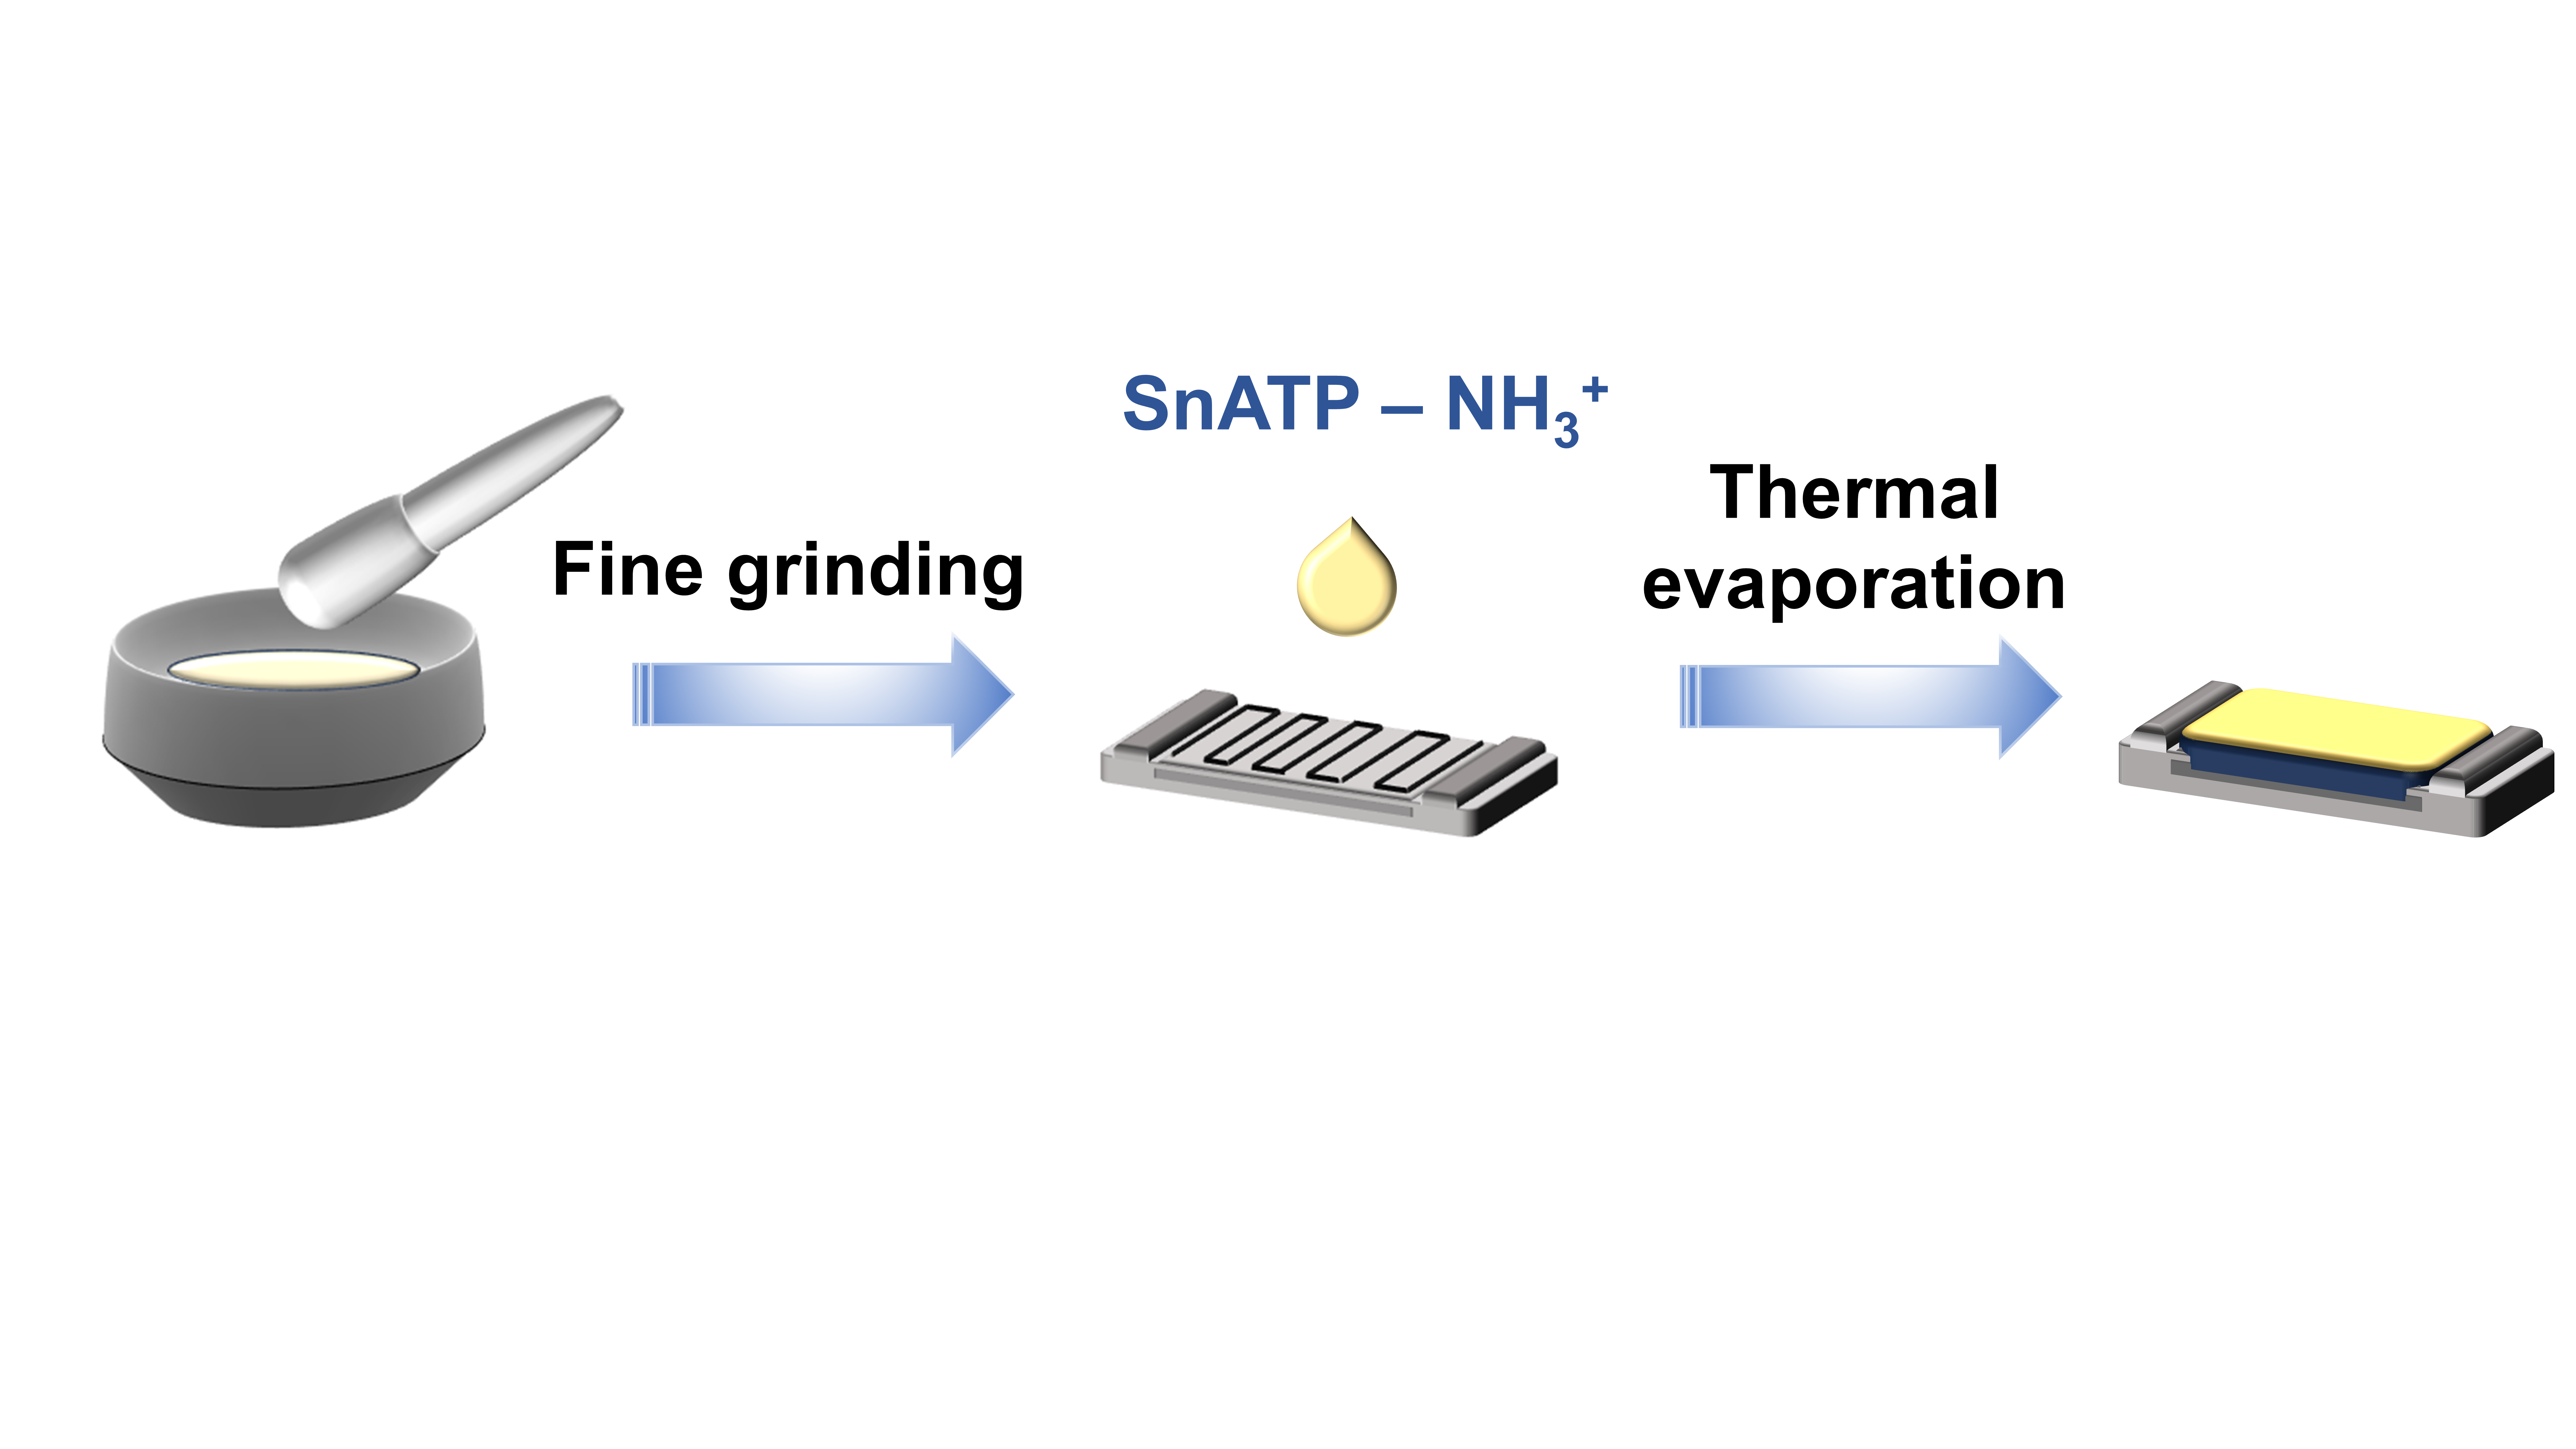


**Figure S7.** Fabrication process of the SnATP-NH3+ based sensor.


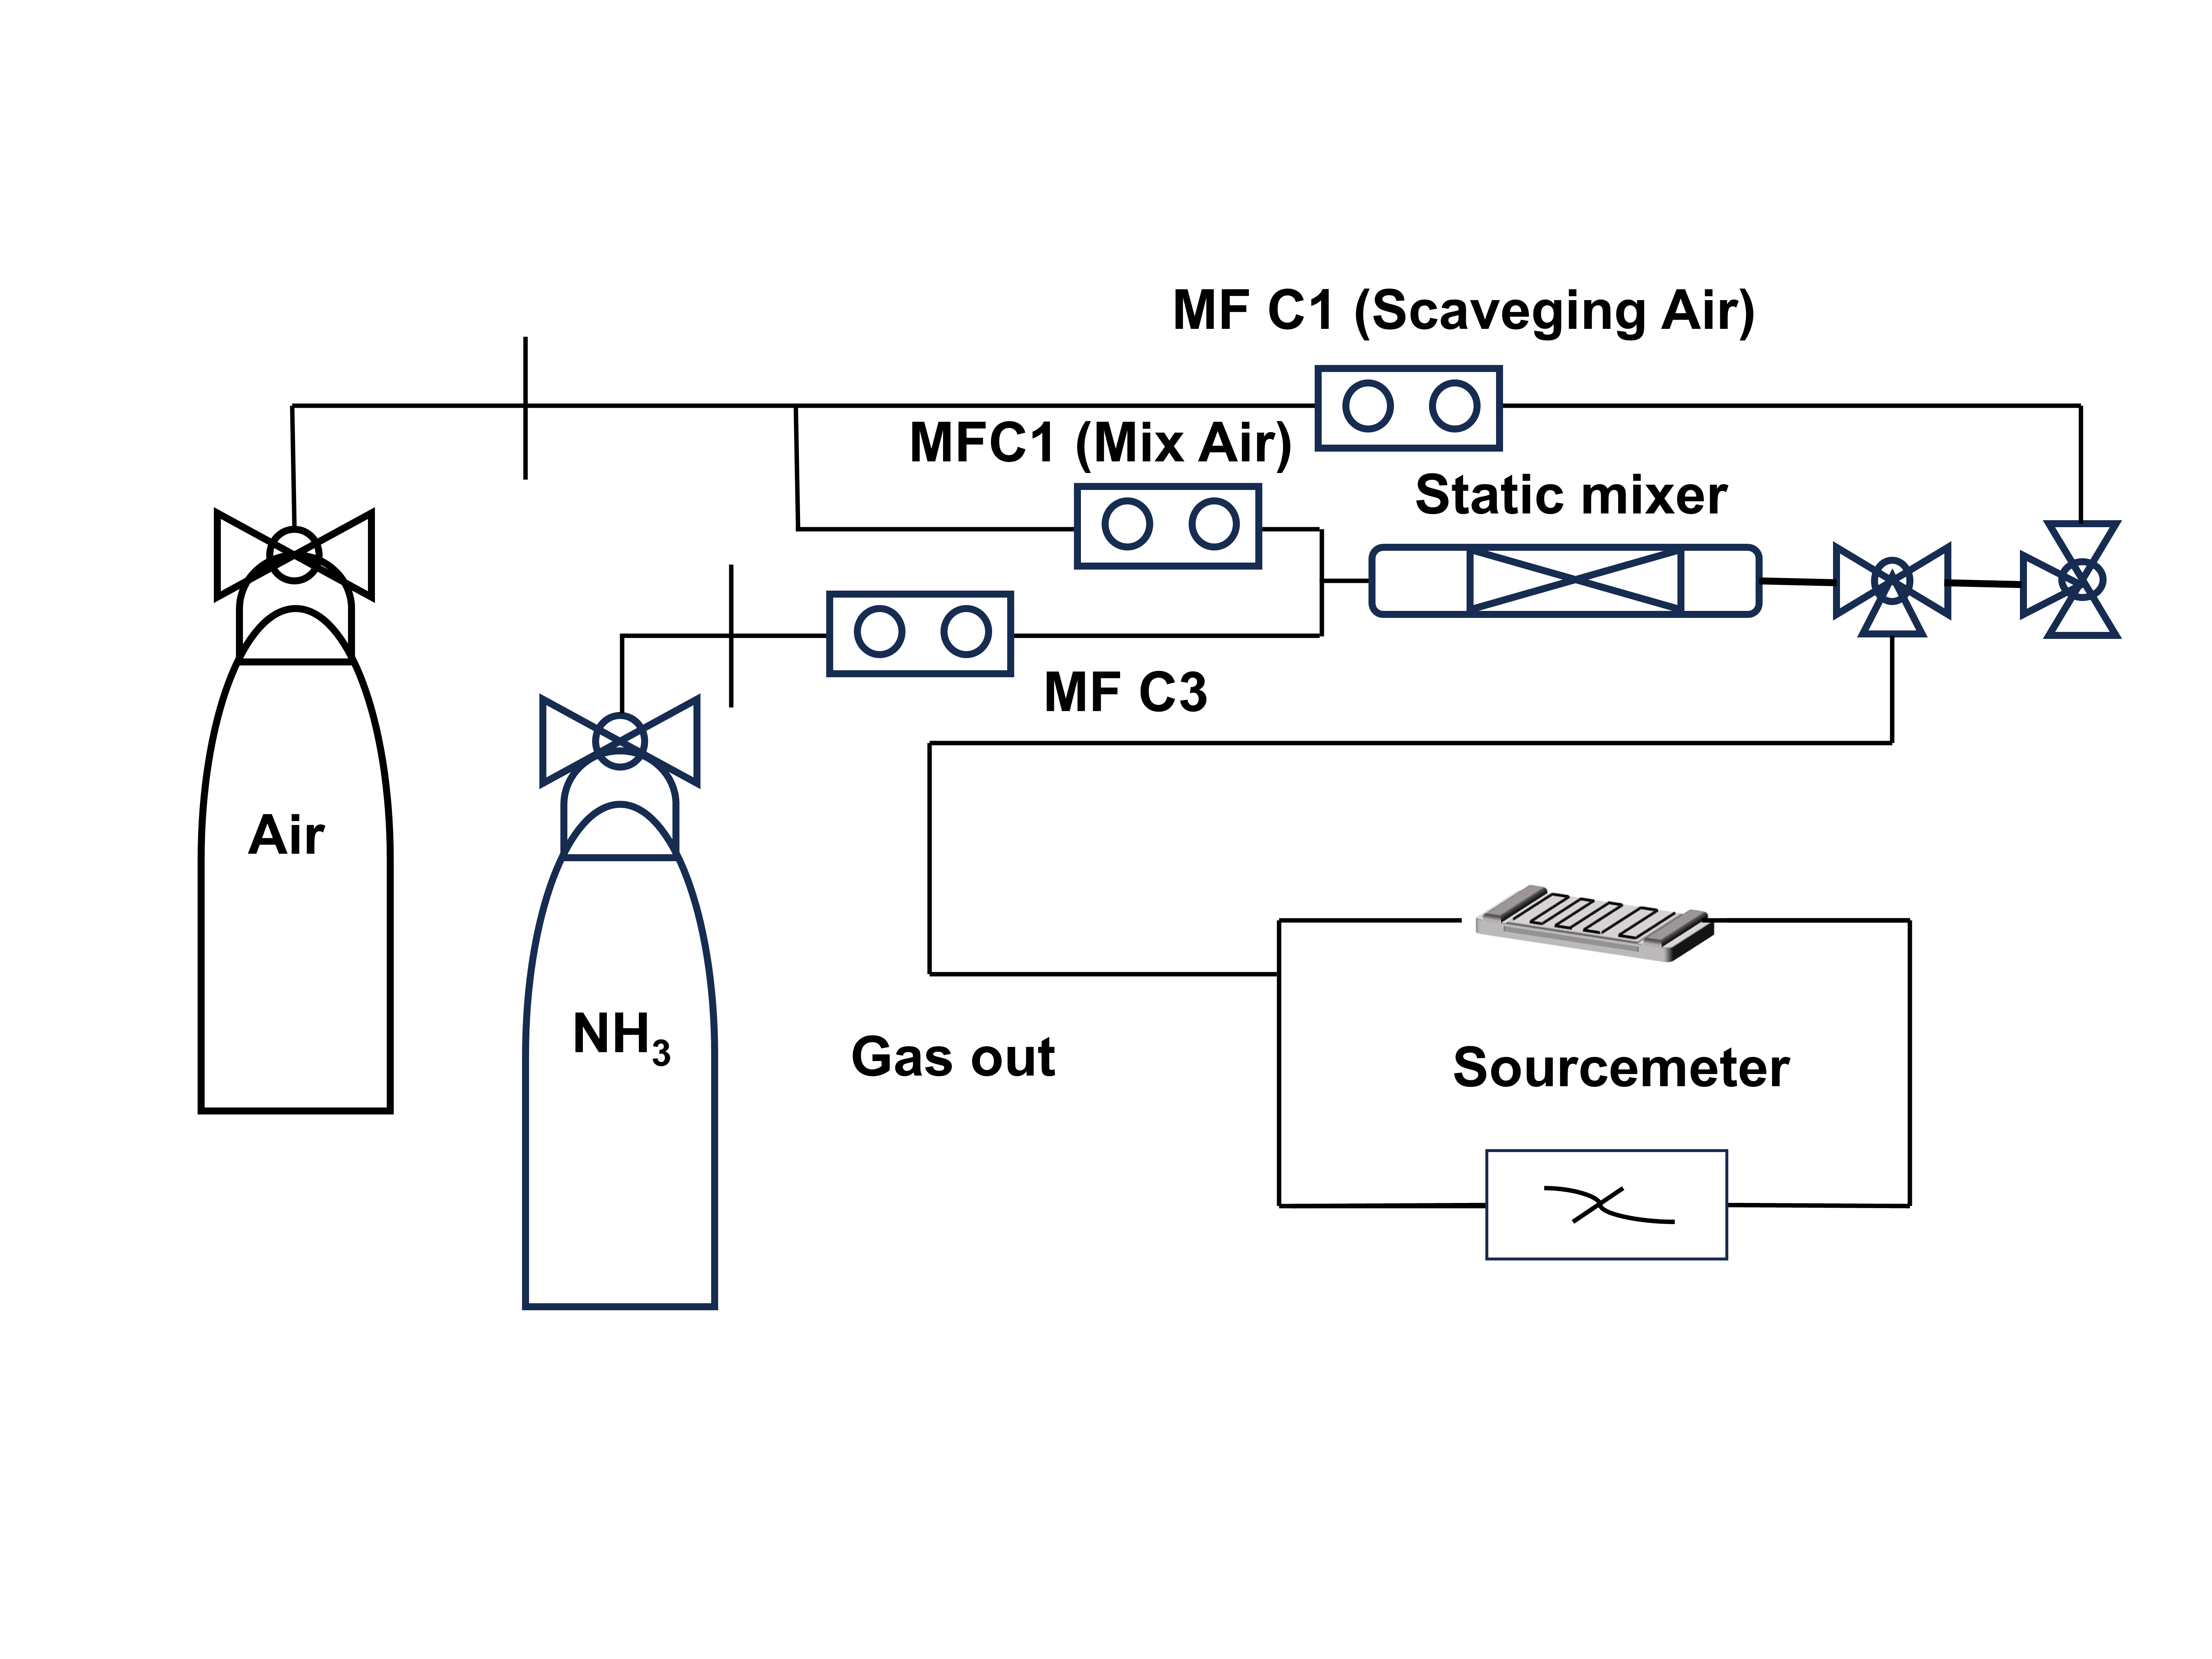


**Figure S8.** Gas sensing test system. Diagram of the homemade gas sensing test system.


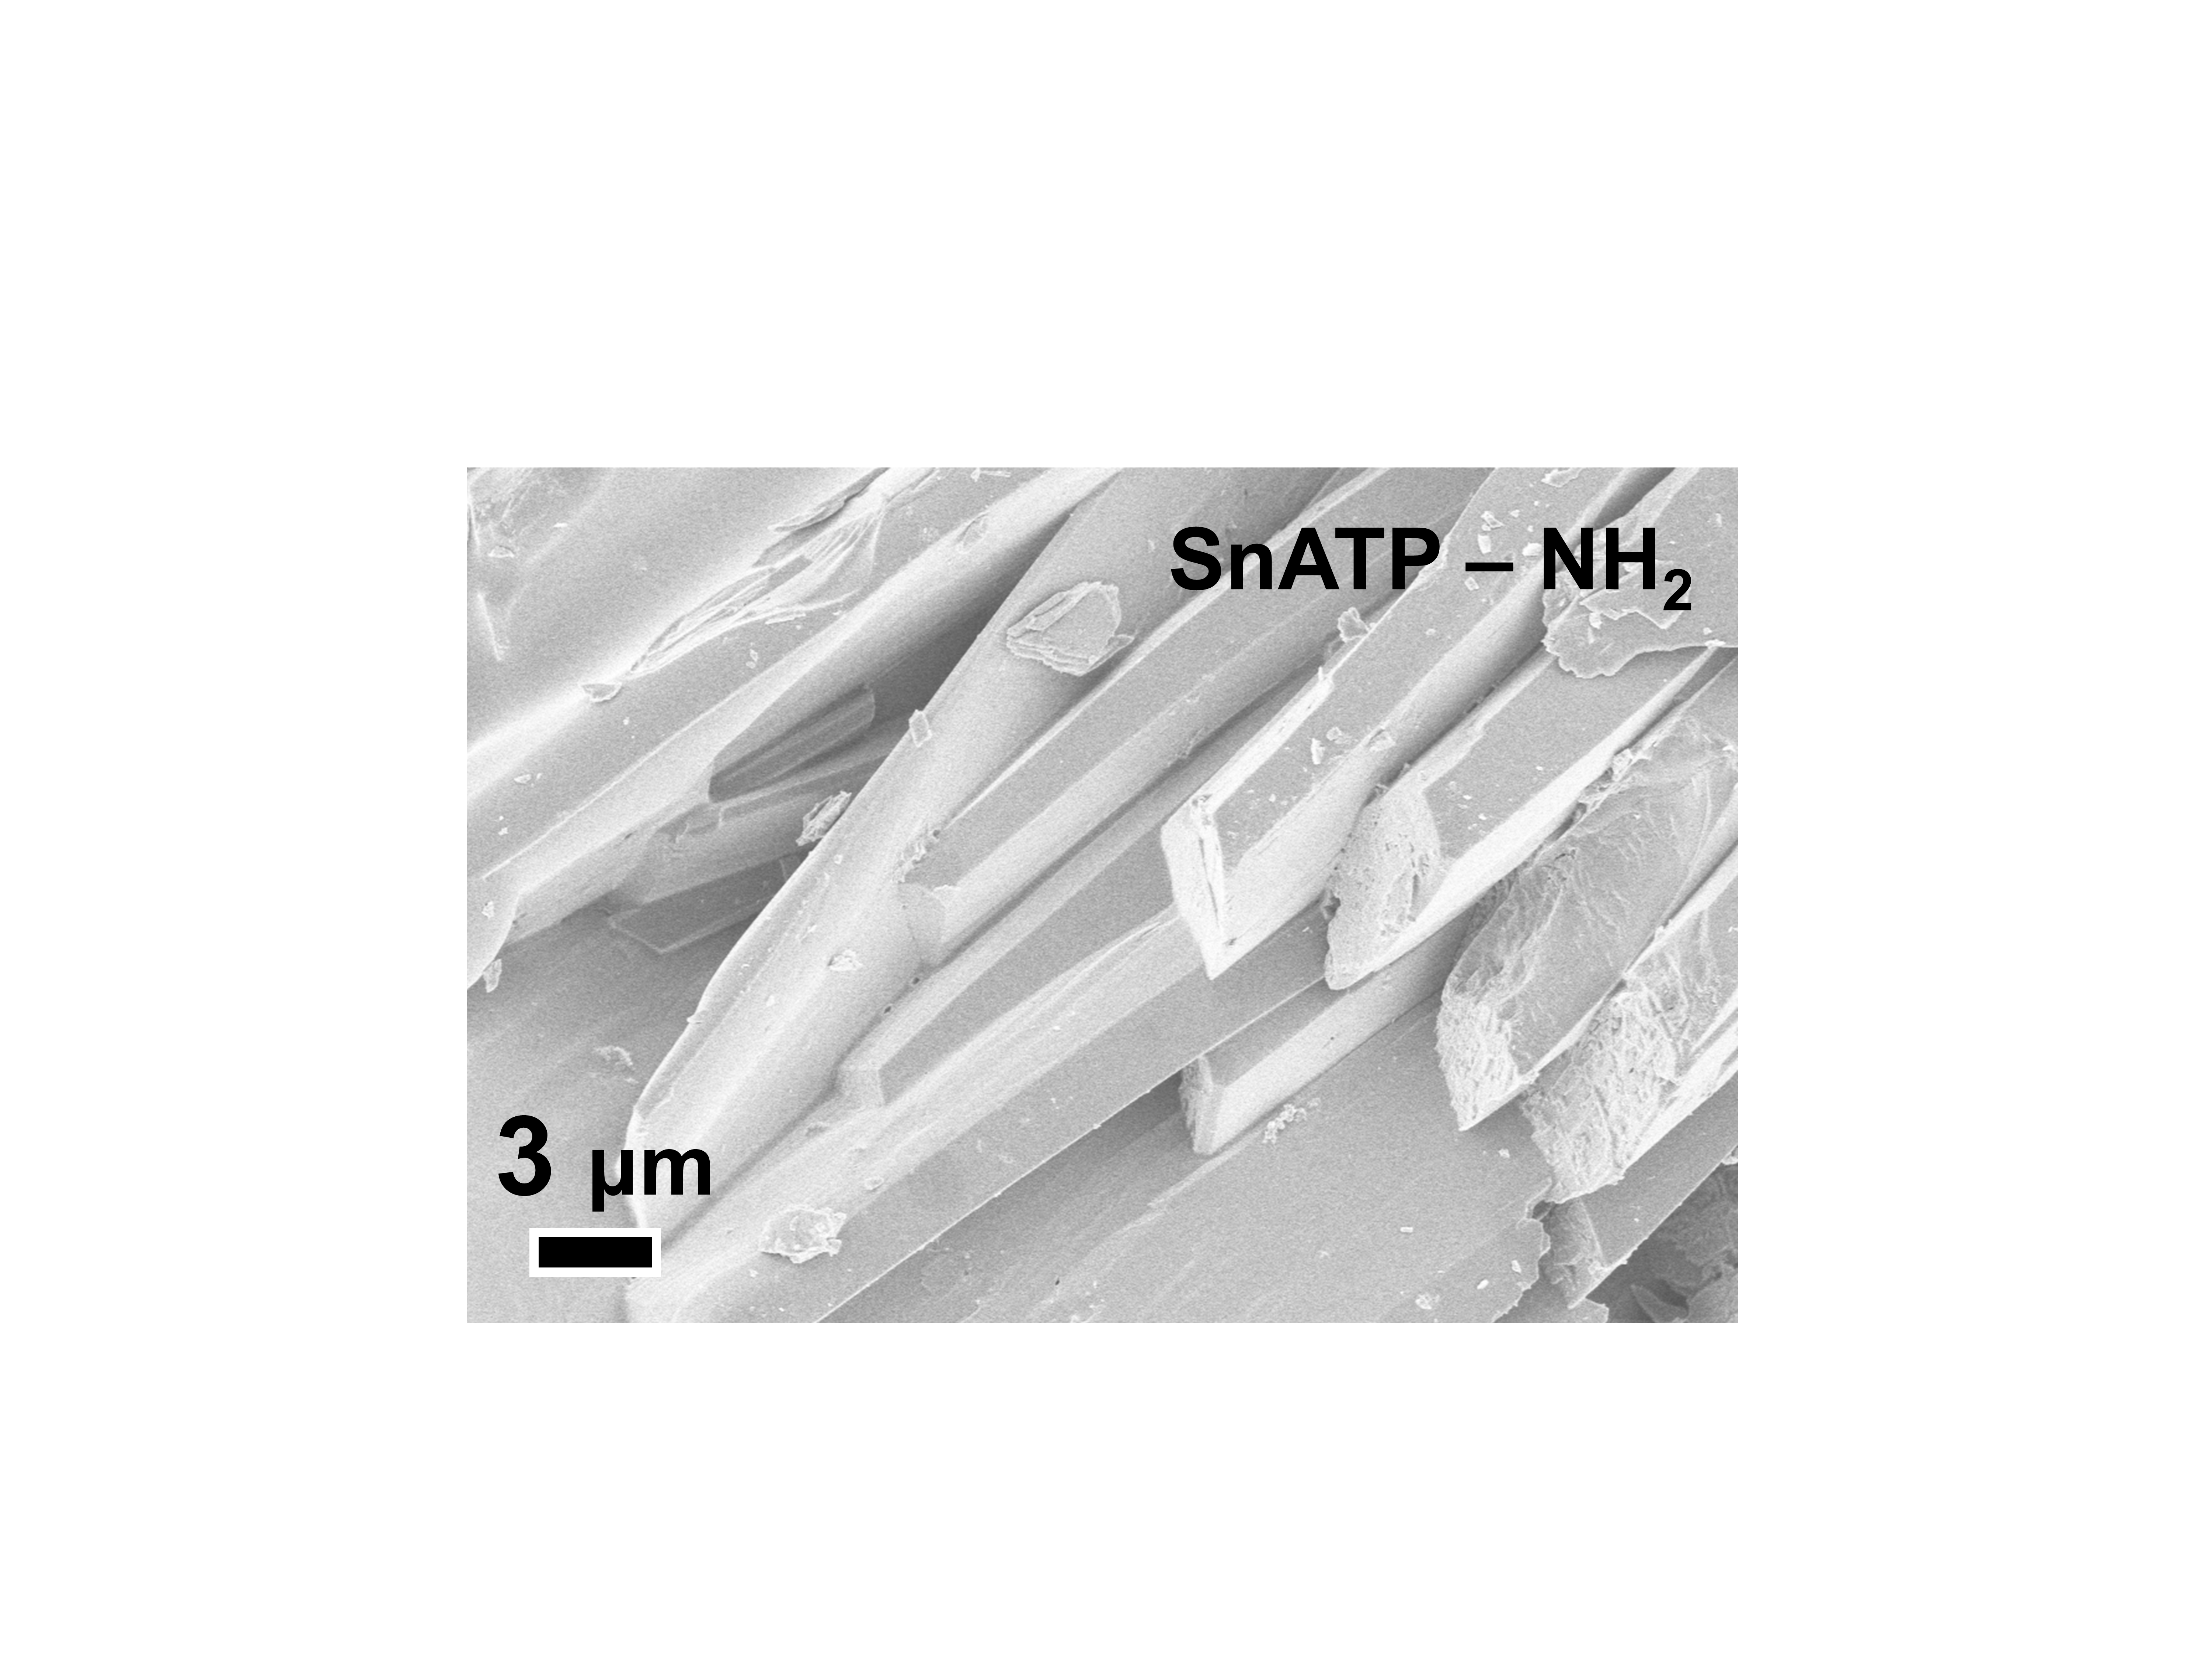


**Figure S9.** Scanning Electron Microscopy (SEM) of SnATP-NH2.


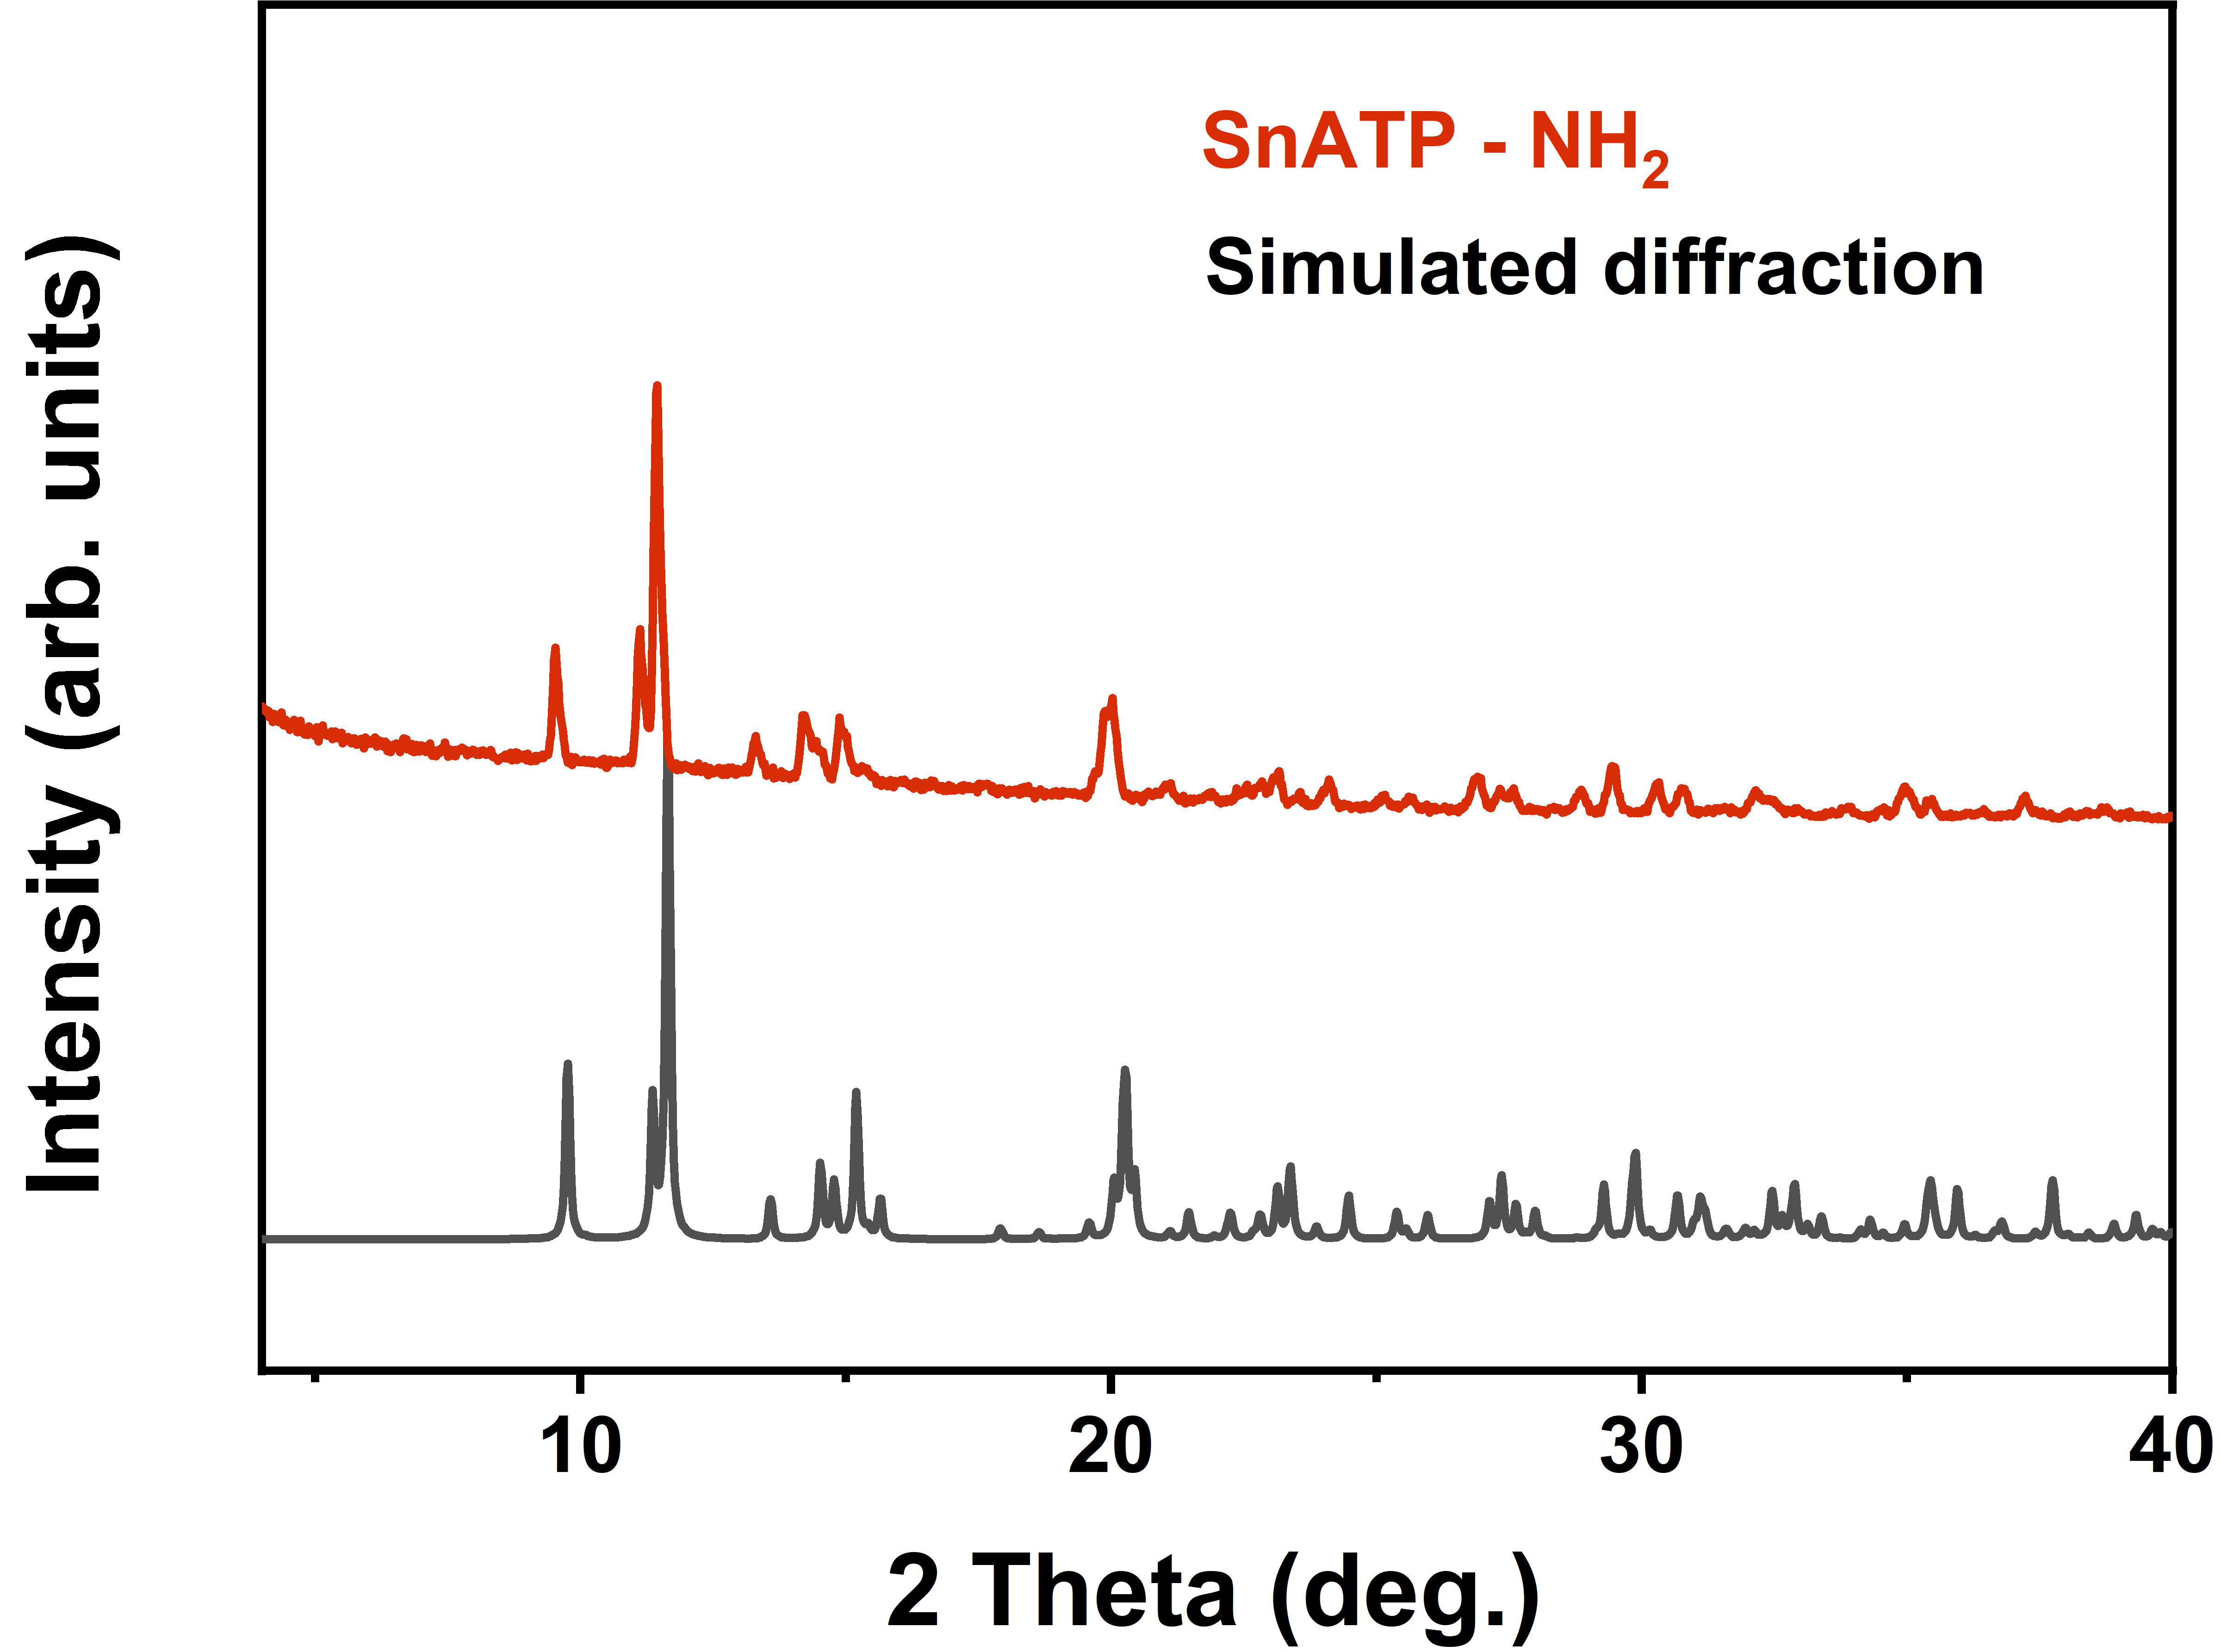


**Figure S10.** Powder X-ray diffraction (PXRD) pattern of SnATP-NH2.


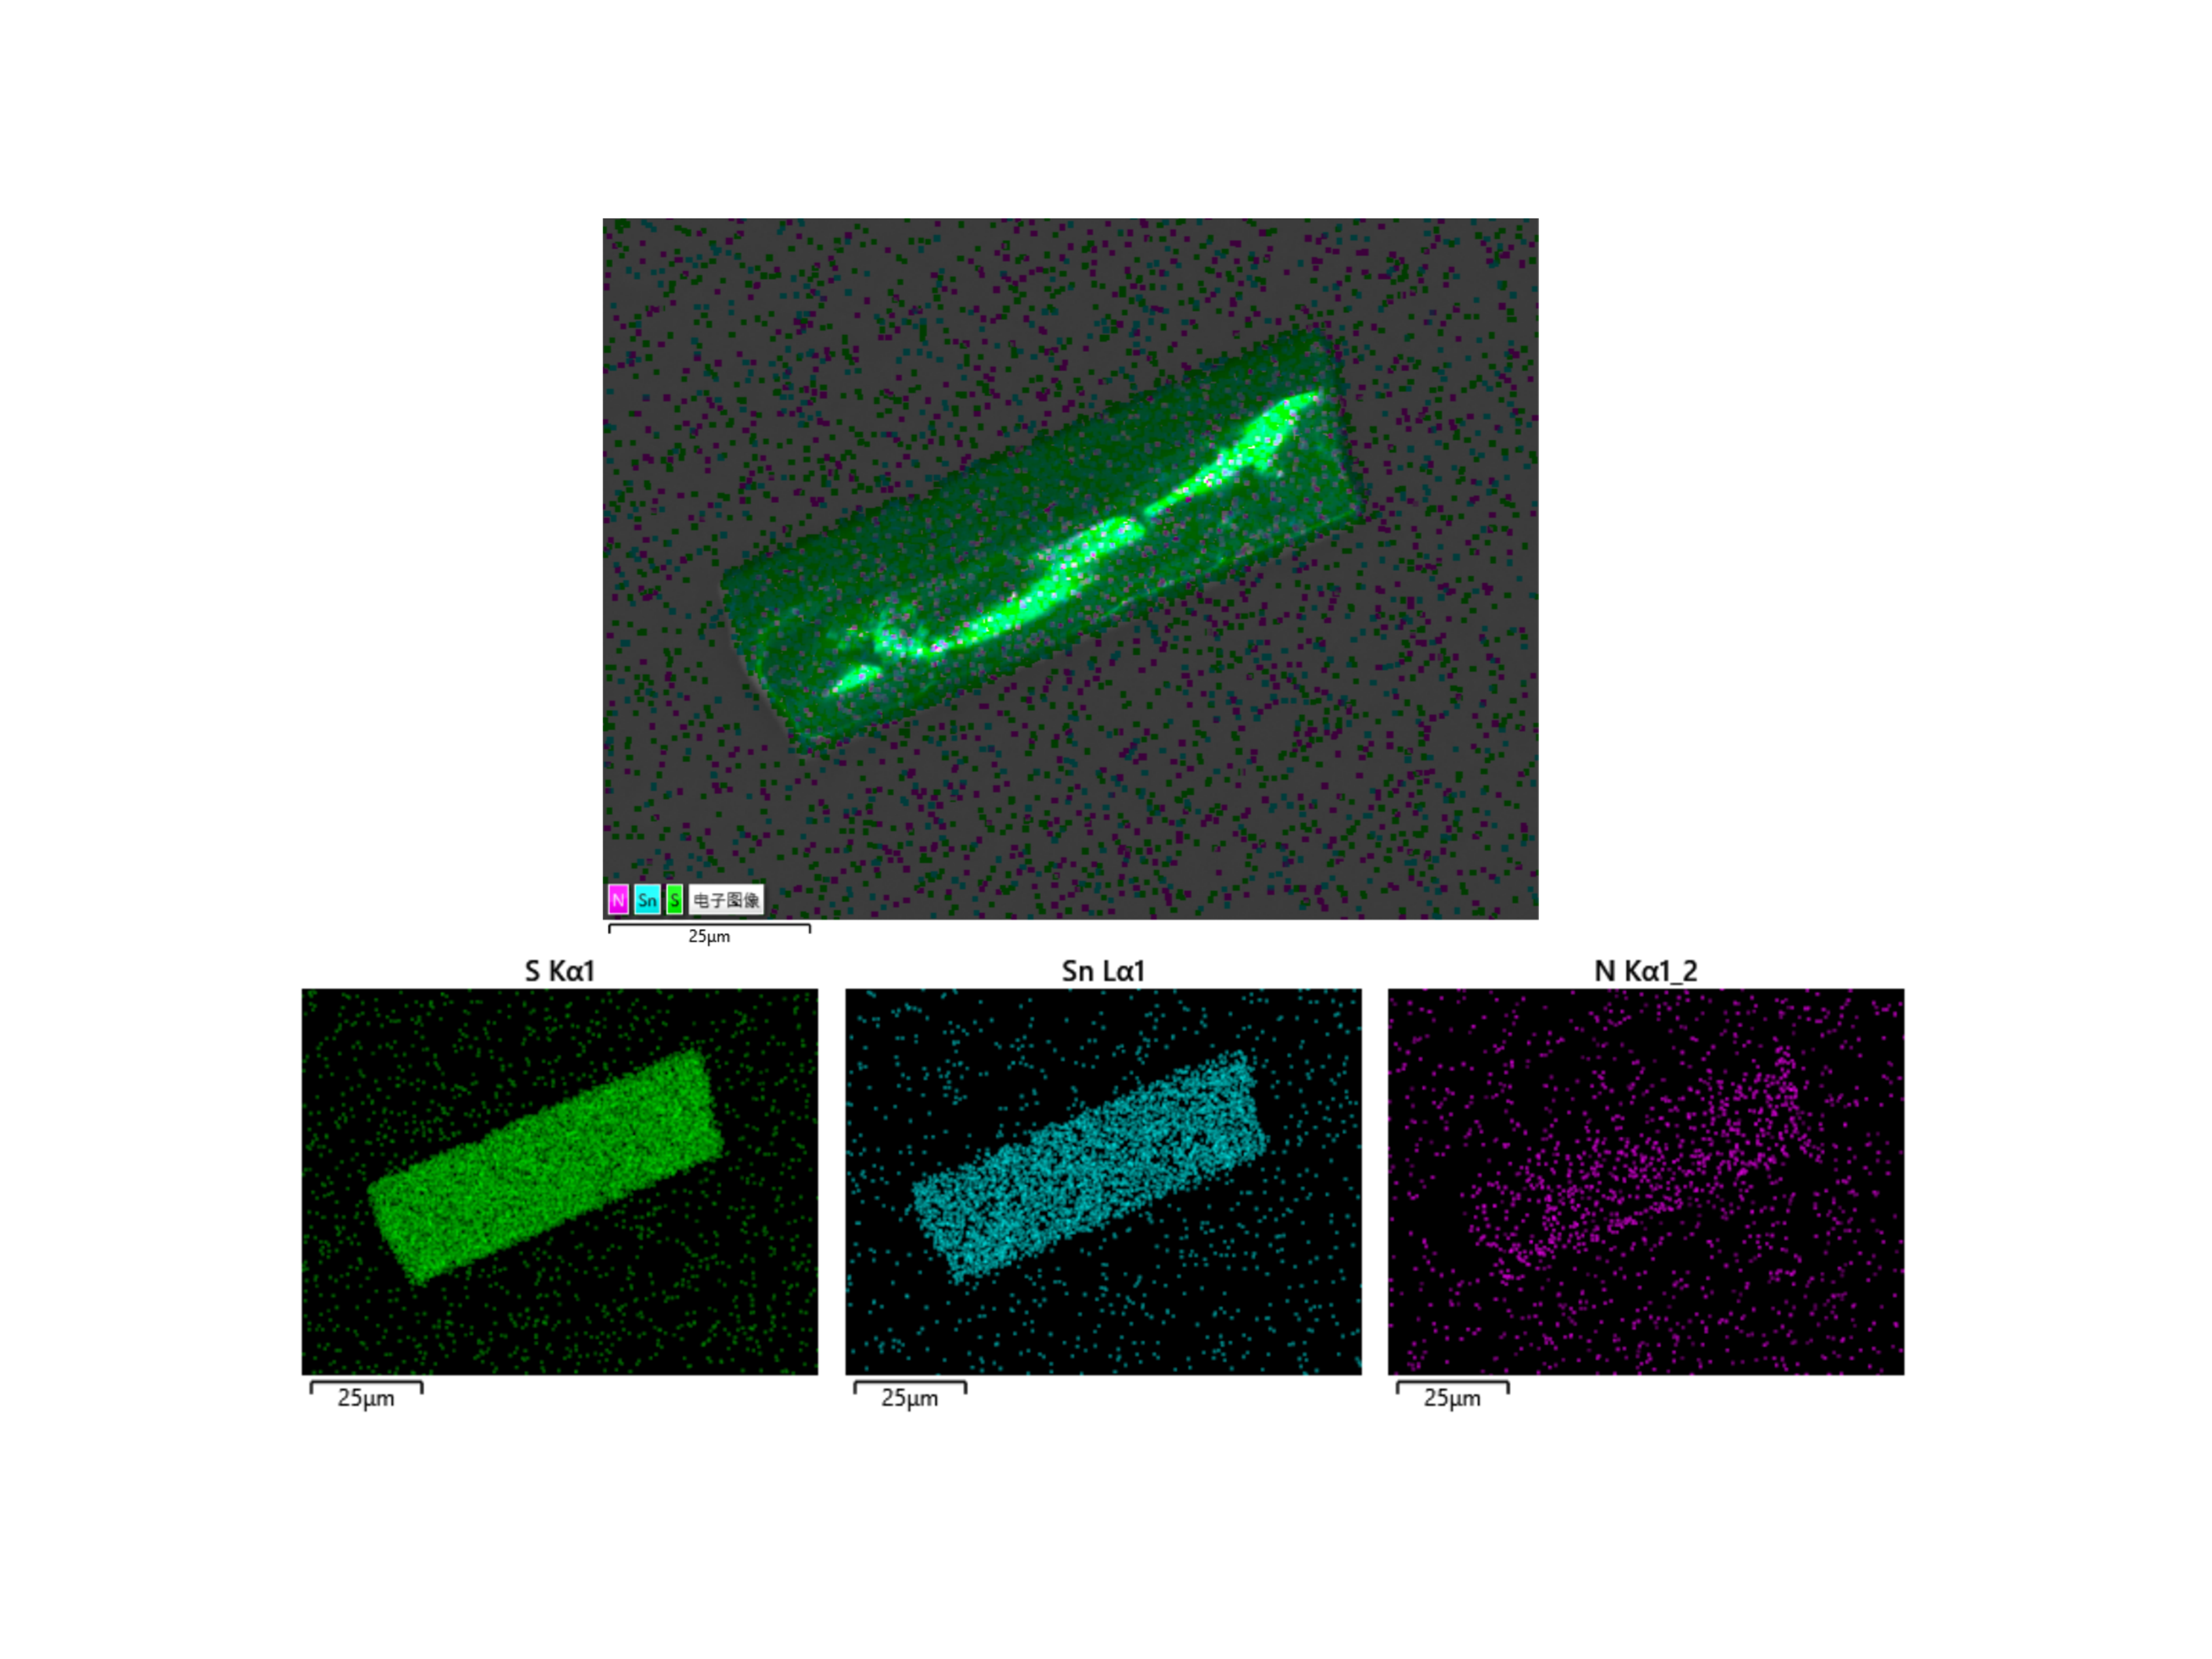


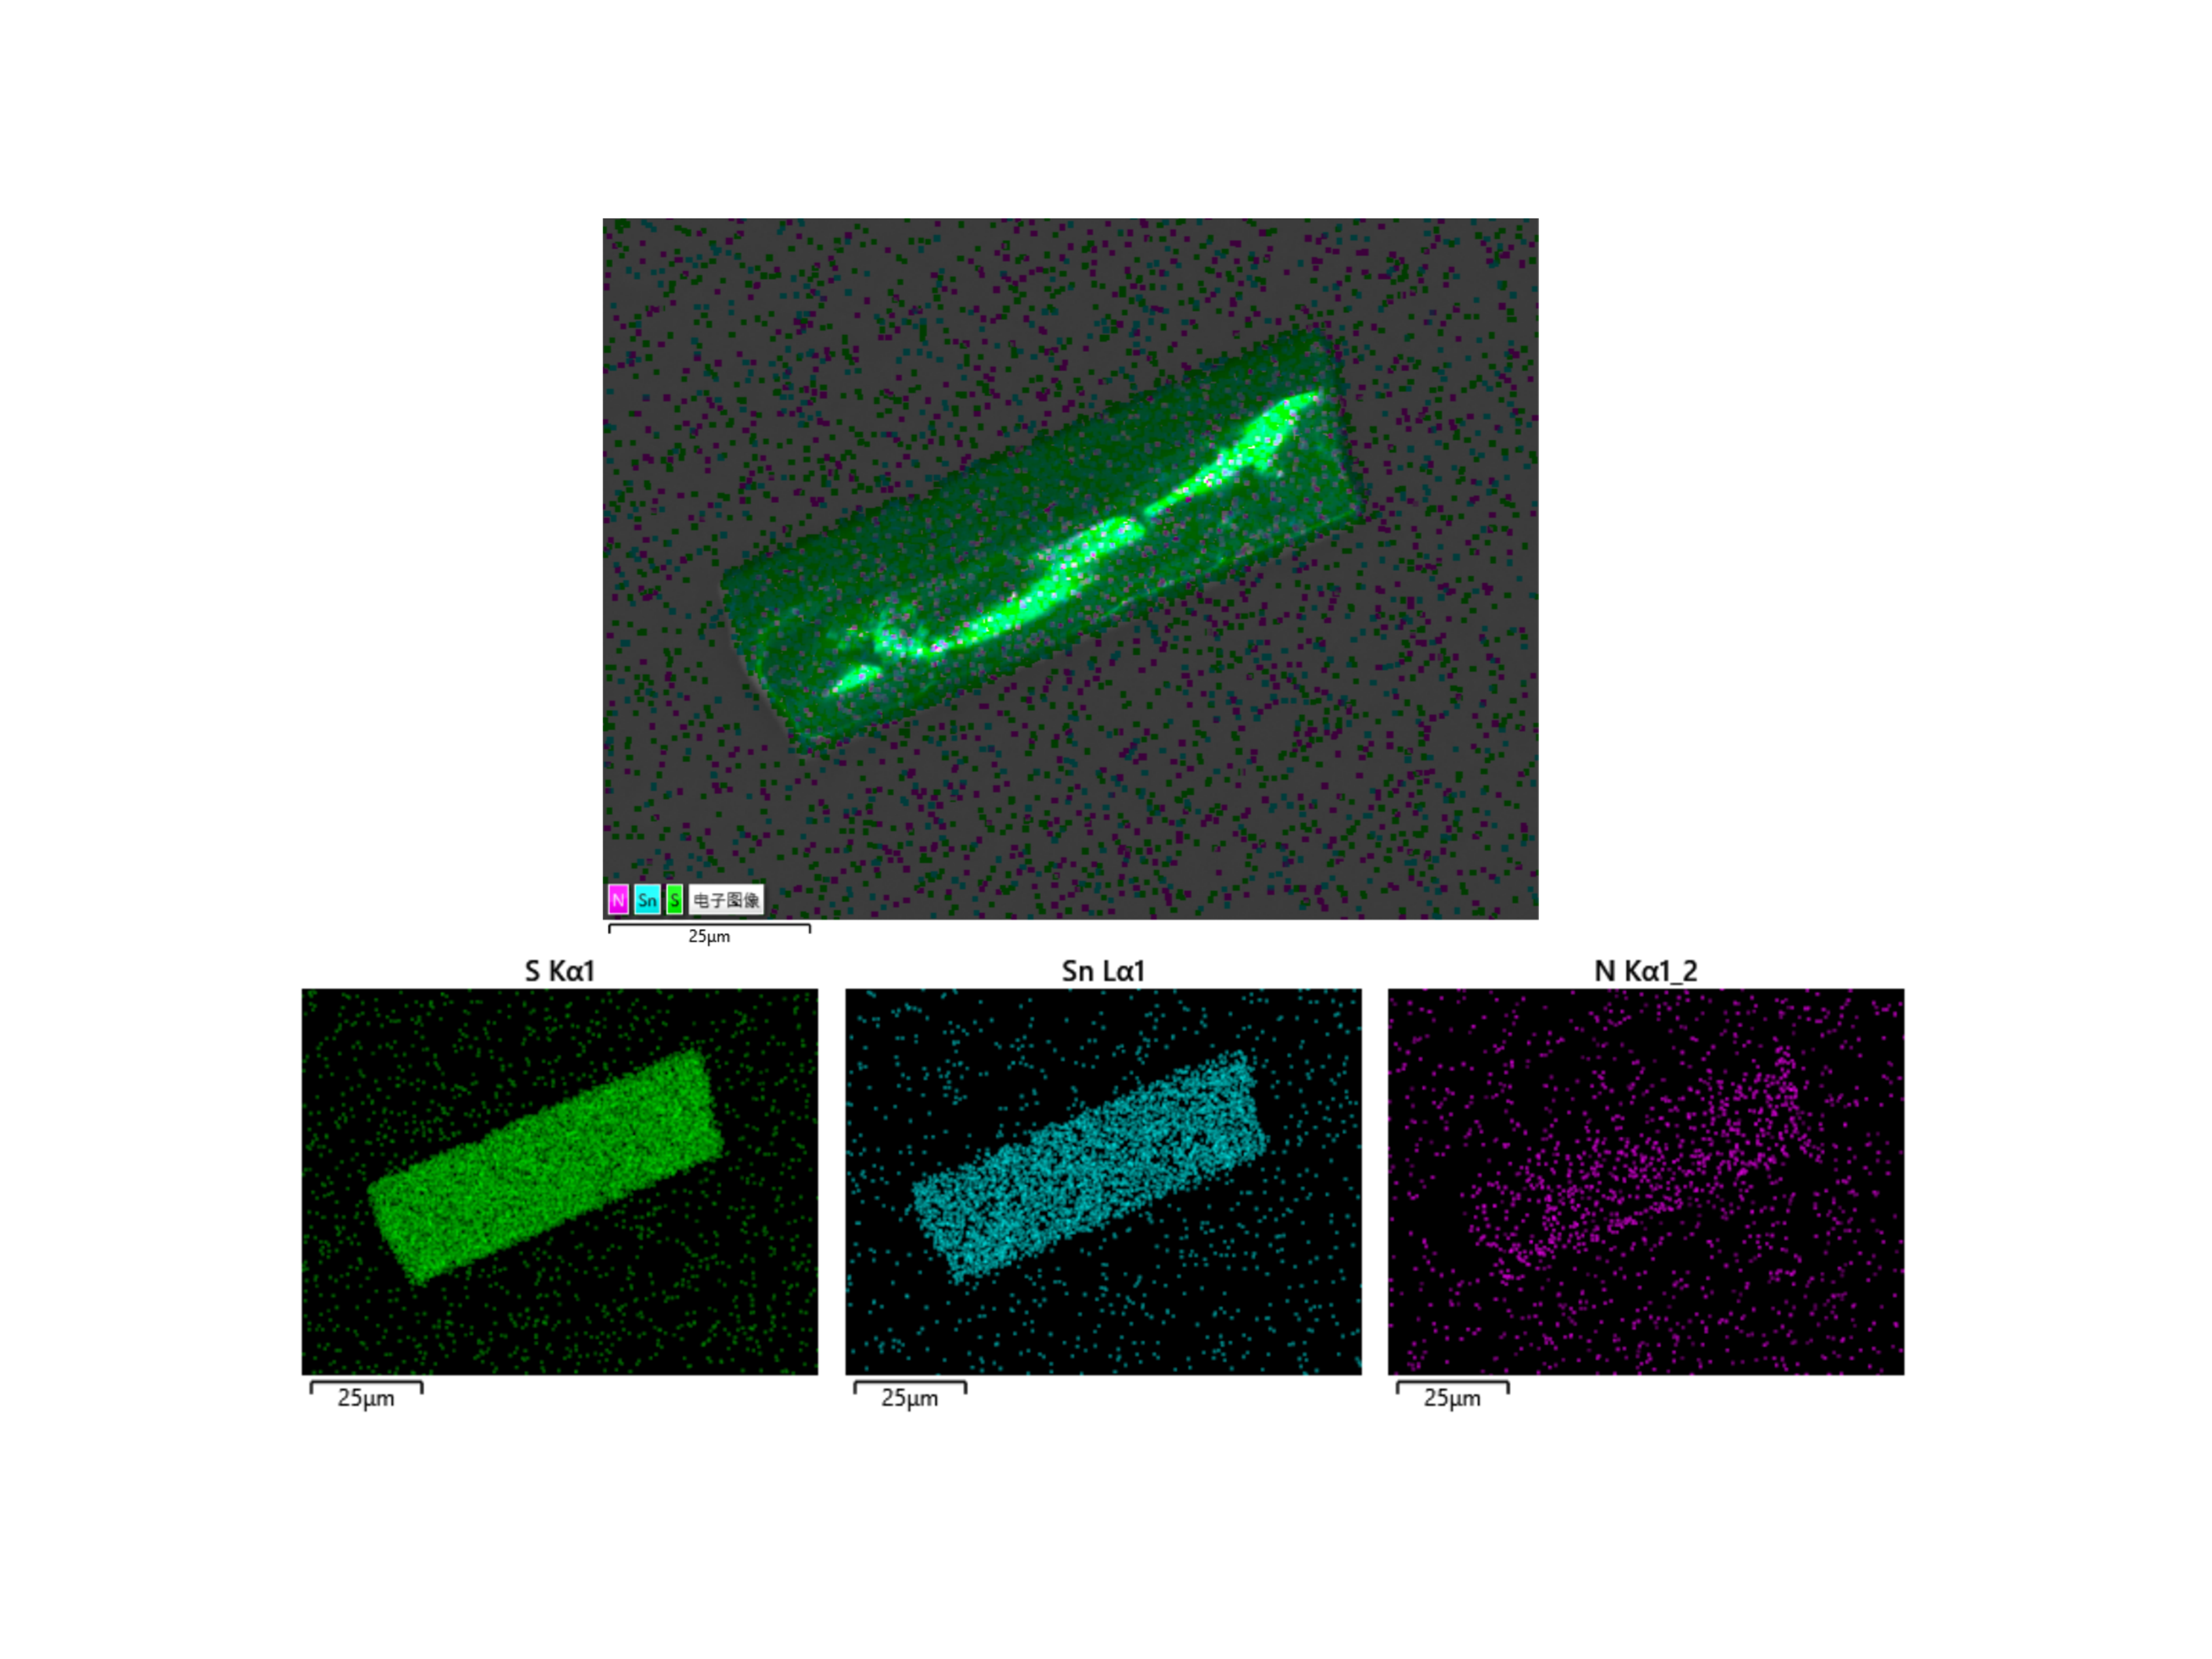


**Figure S11.** Element distribution (EDS) analysis of SnATP-NH2. EDS images of SnATP-NH2.


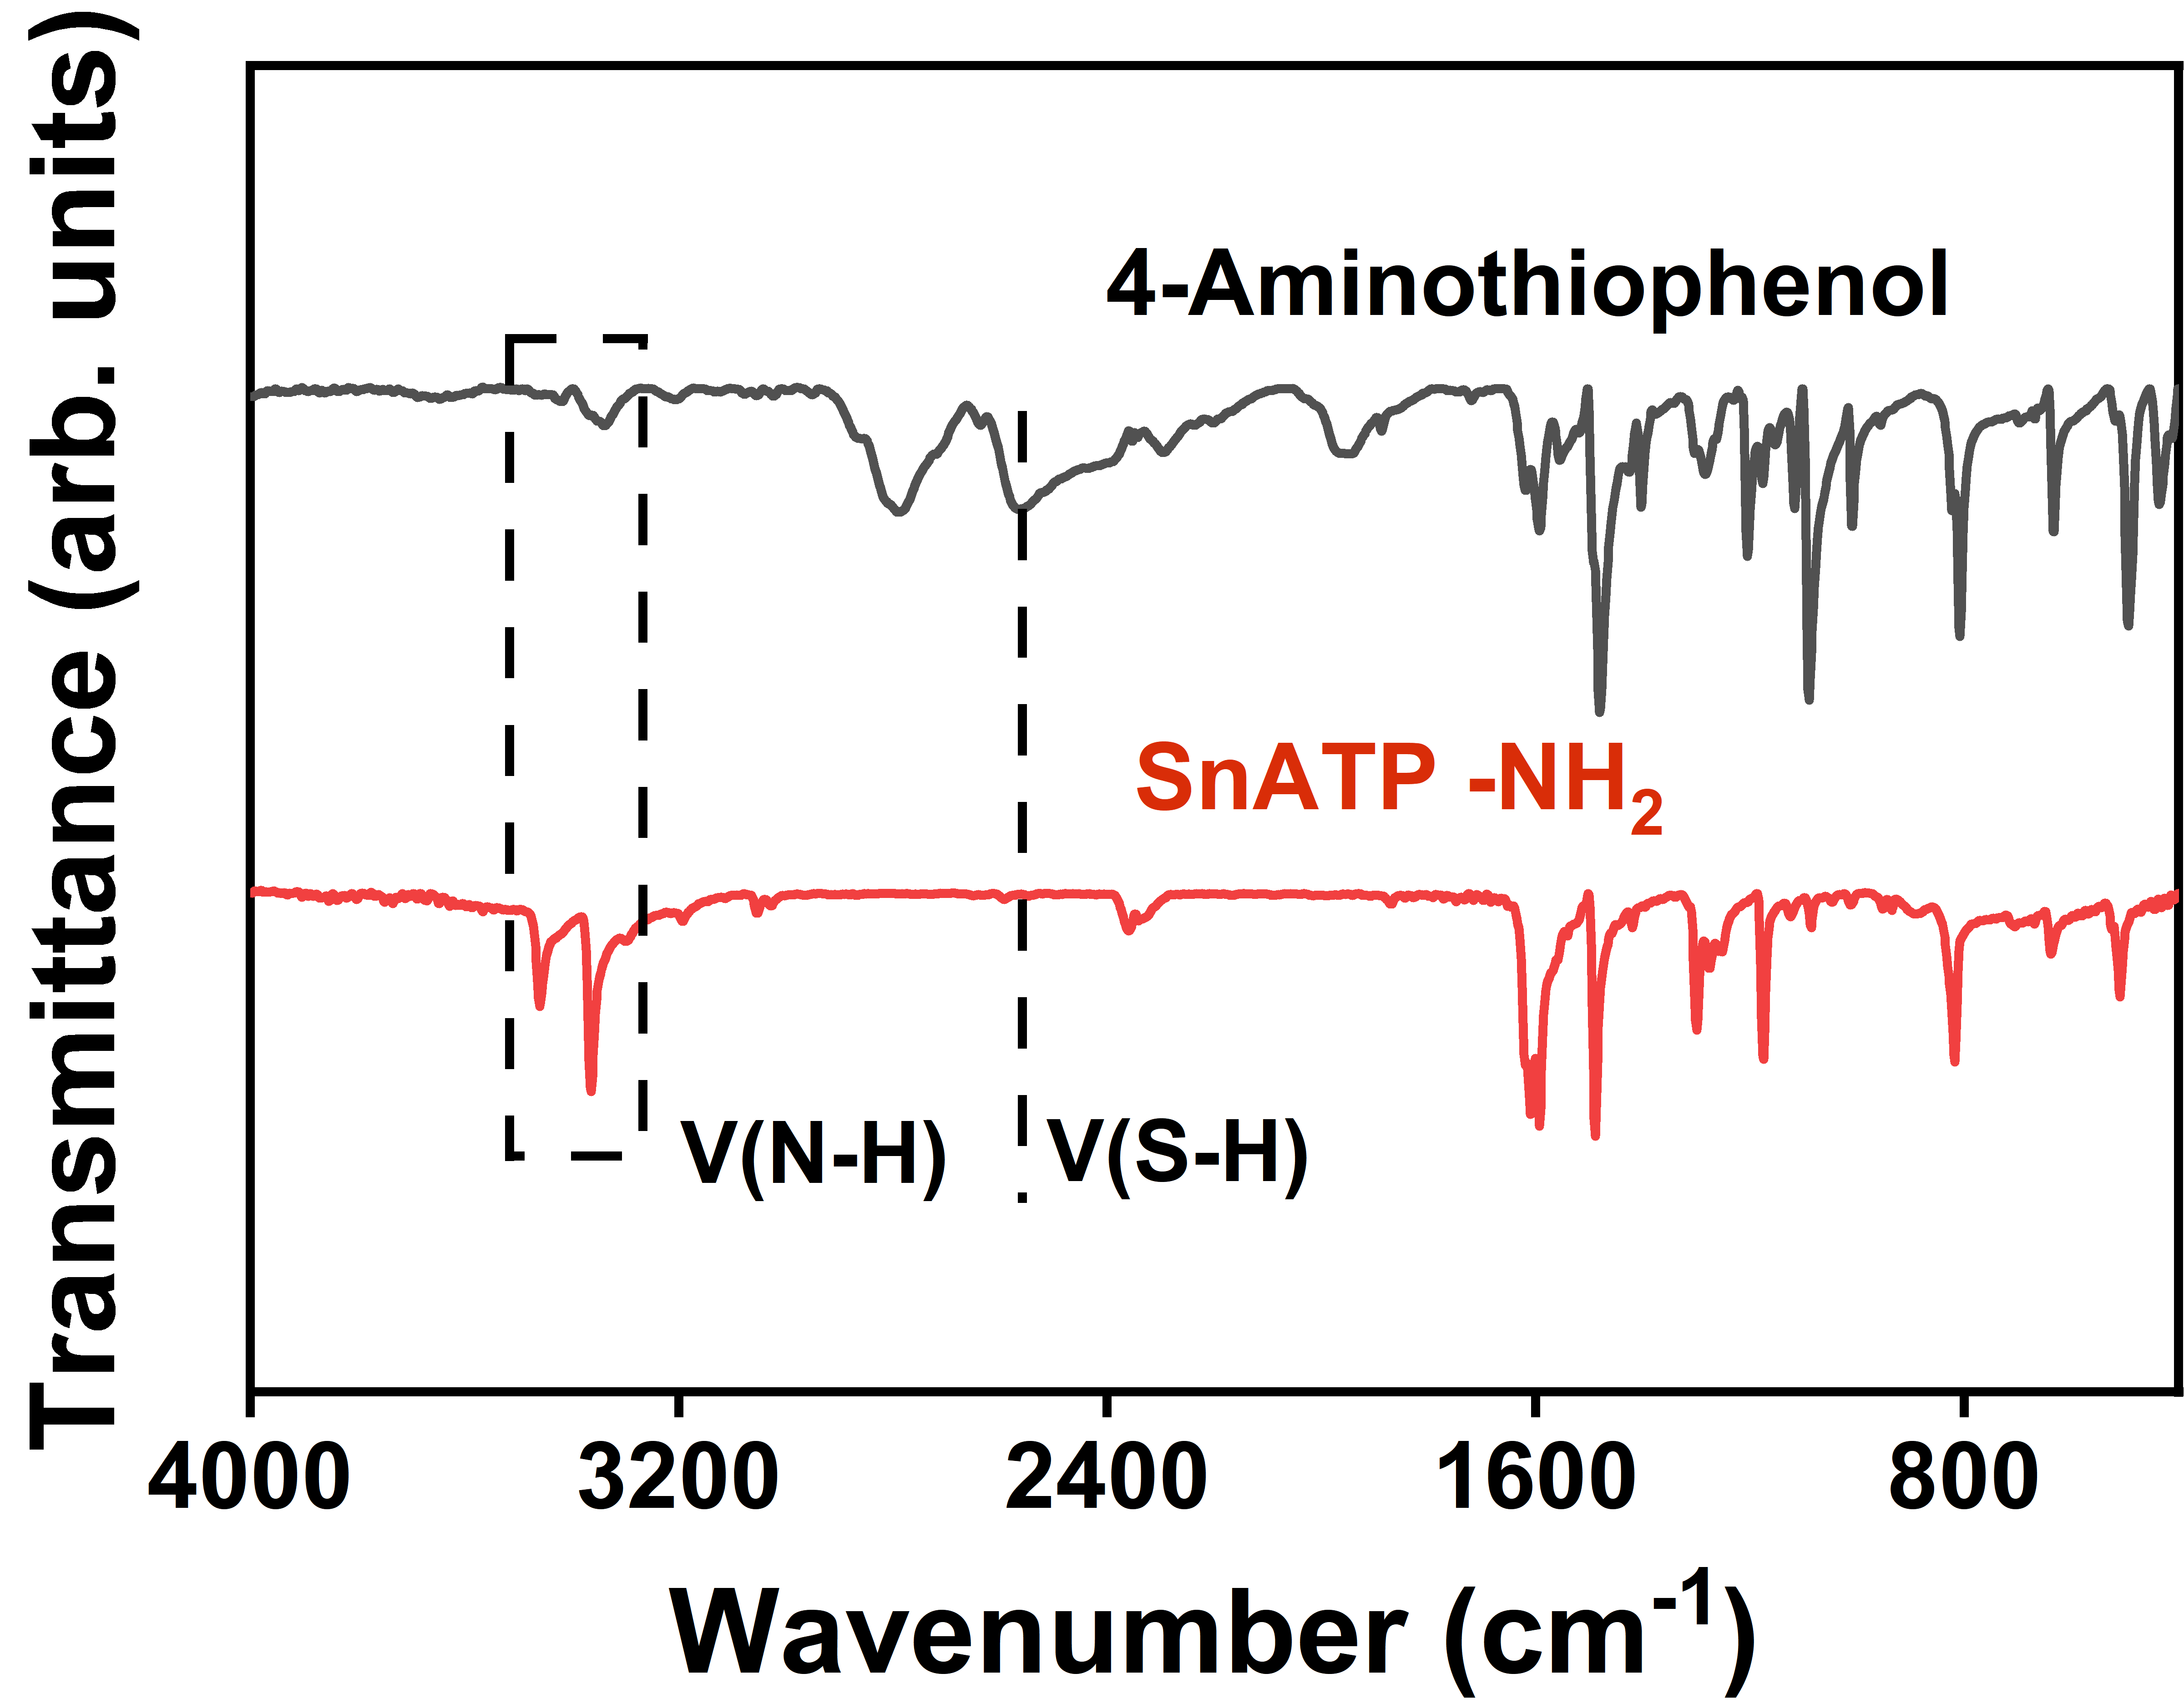


**Figure S12.** Infrared characterization. Fourier-transform Infrared (FTIR) spectra of SnATP-NH2 and 4-Aminothiophenol.


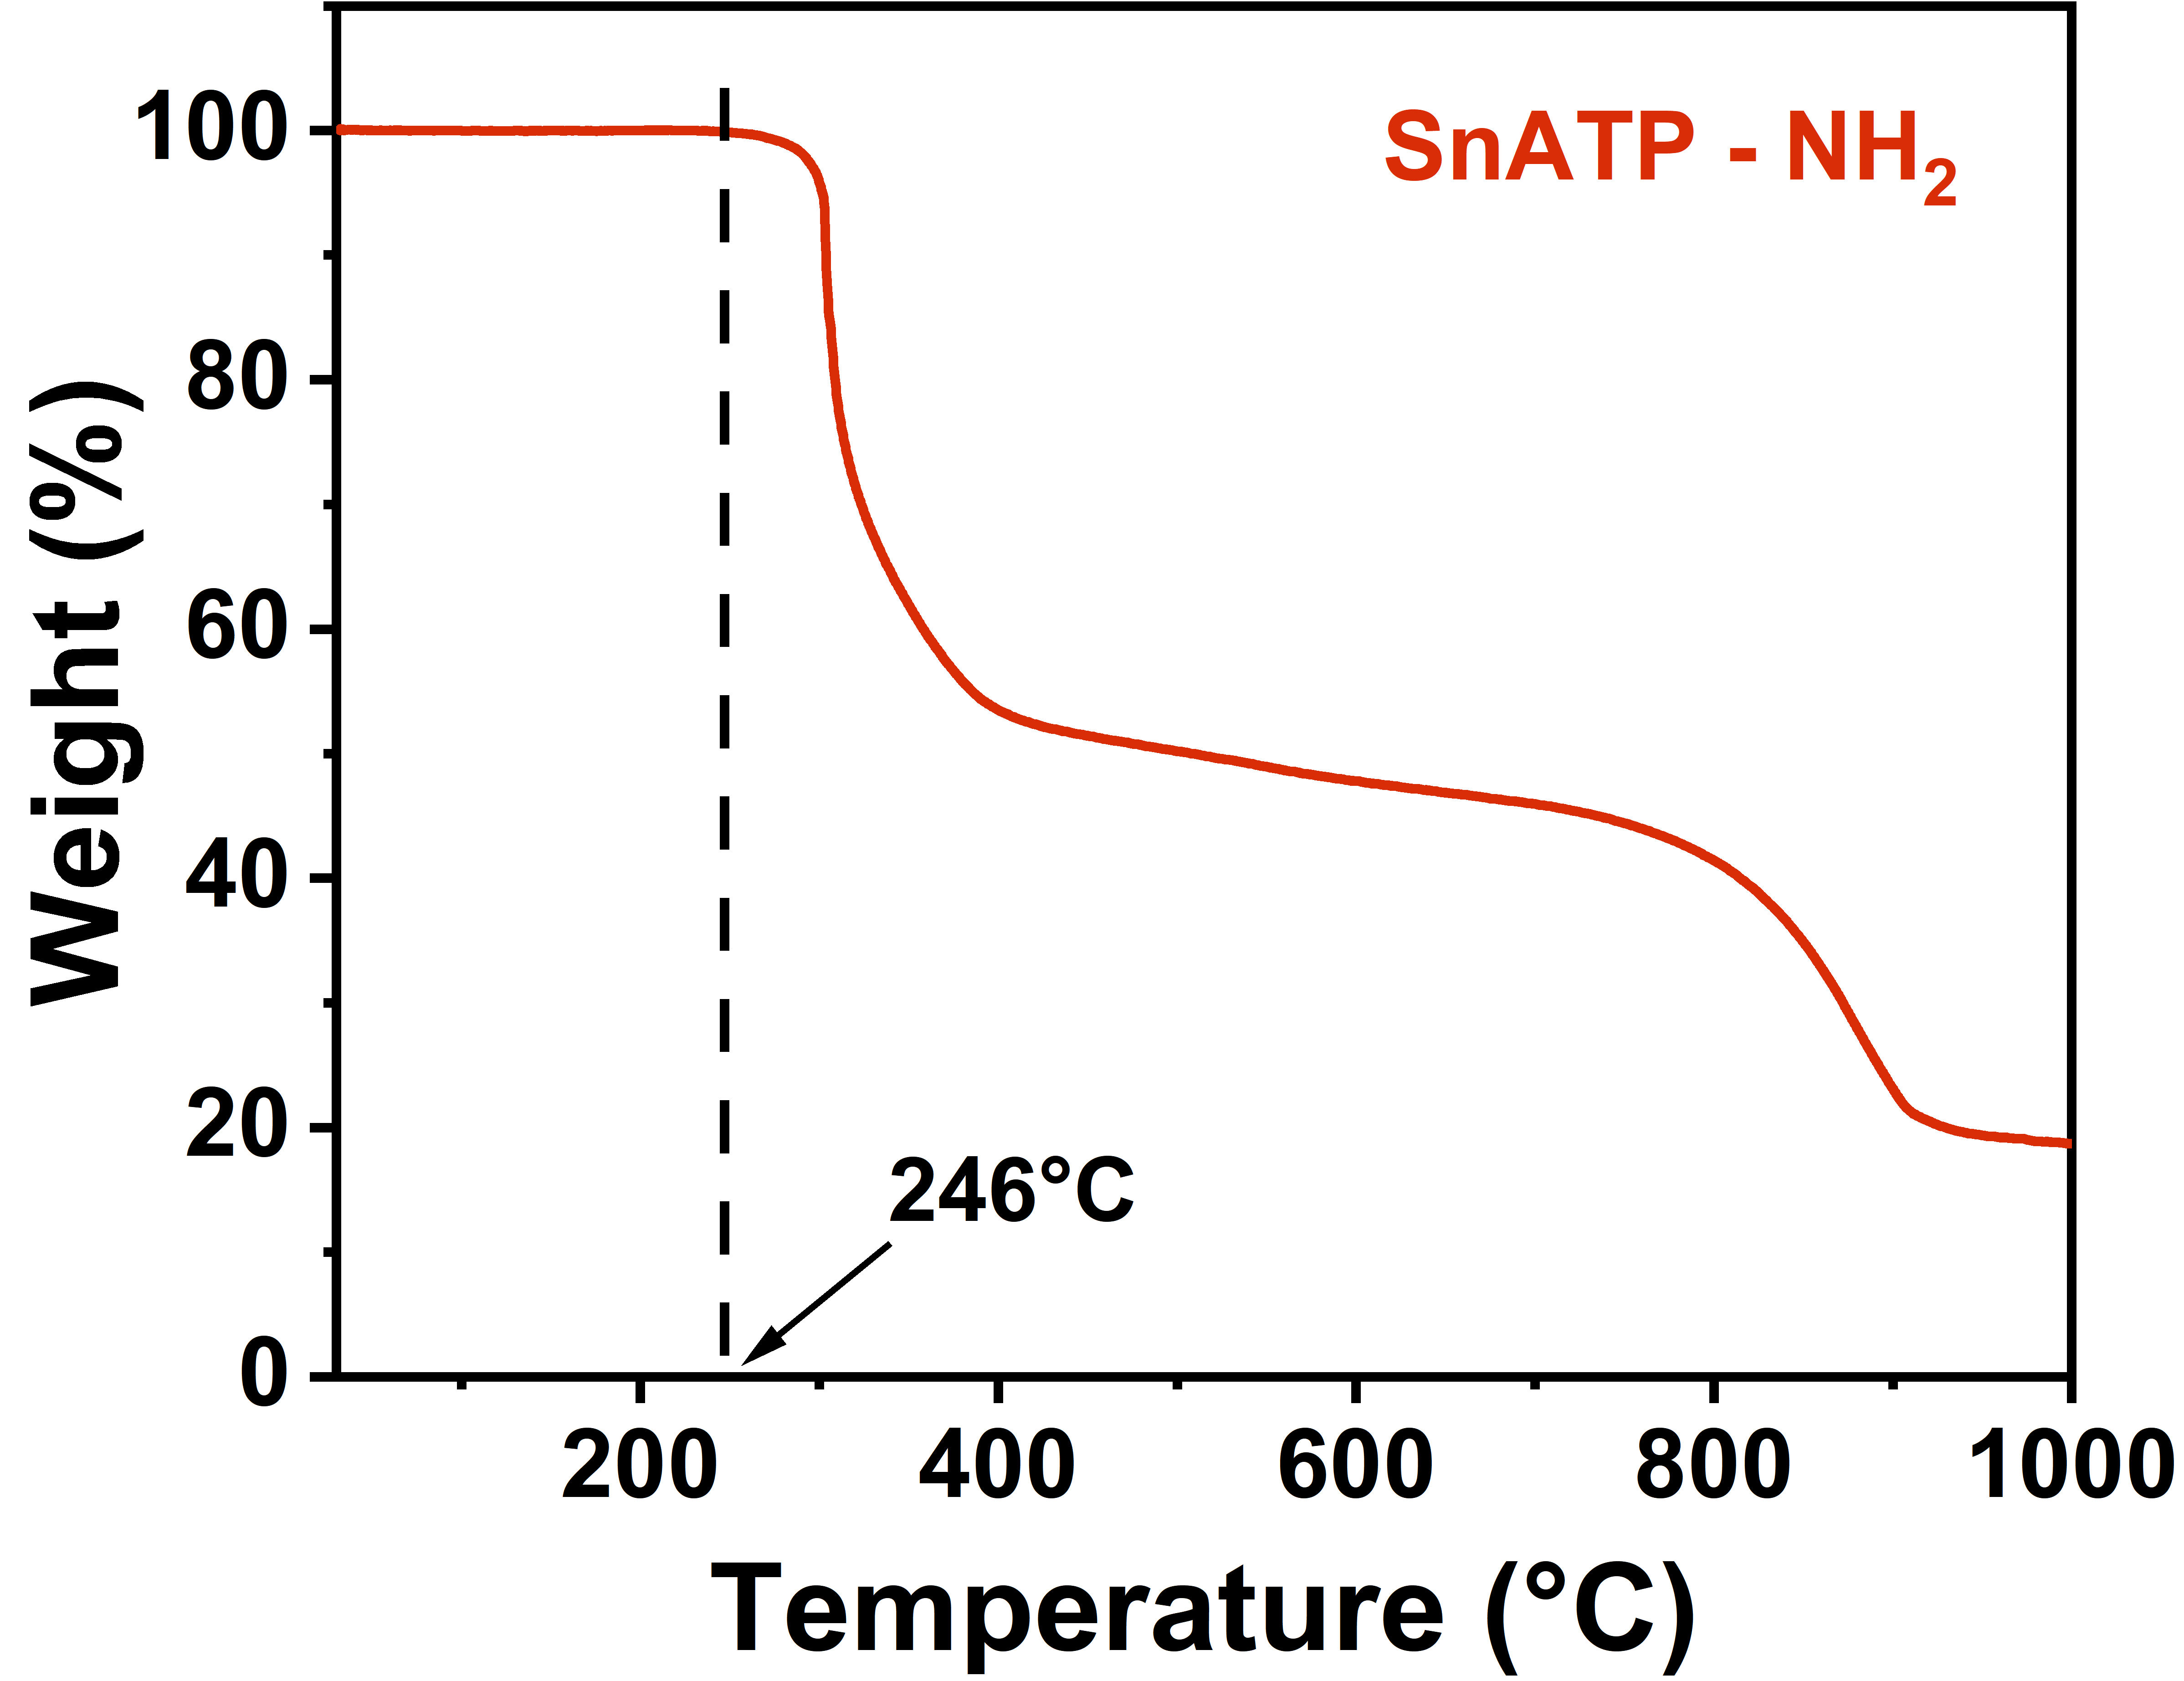


**Figure S13.** Thermogravimetric analysis (TG) of SnATP-NH2. TG curve of SnATP-NH2.


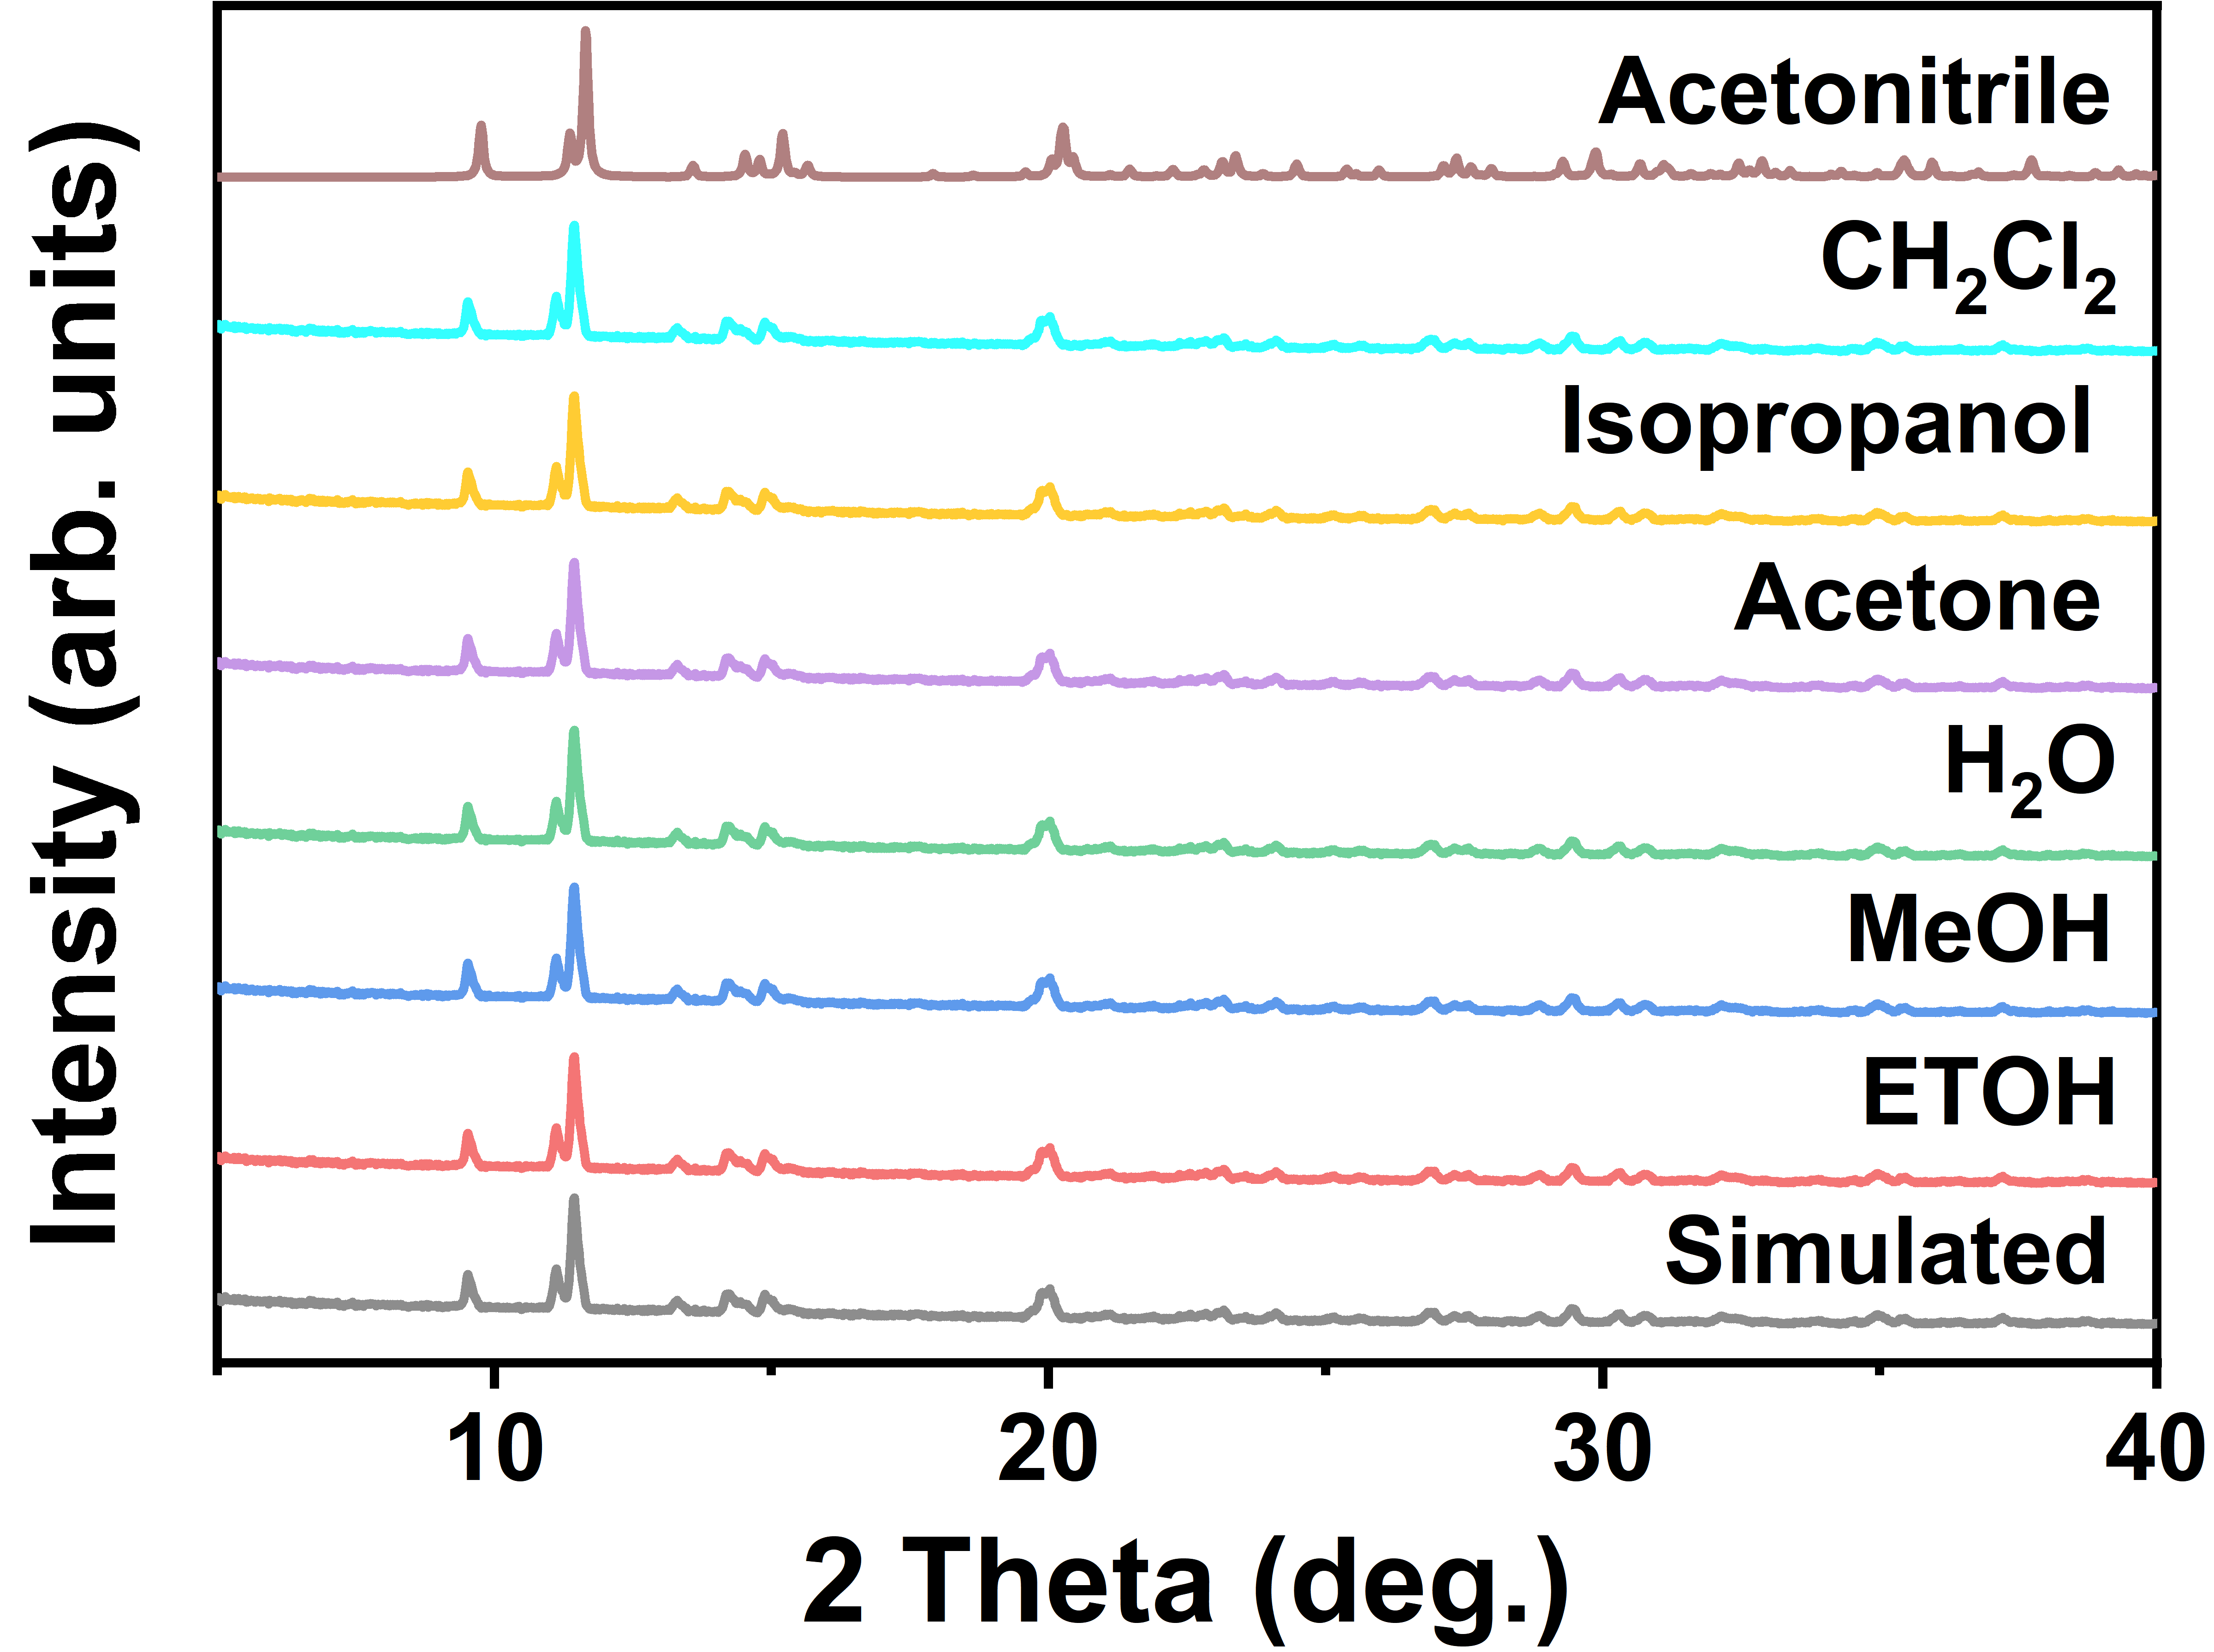


**Figure S14.** PXRD patterns of SnATP-NH2after immersion in diﬀerent organic solvents for 7 days.


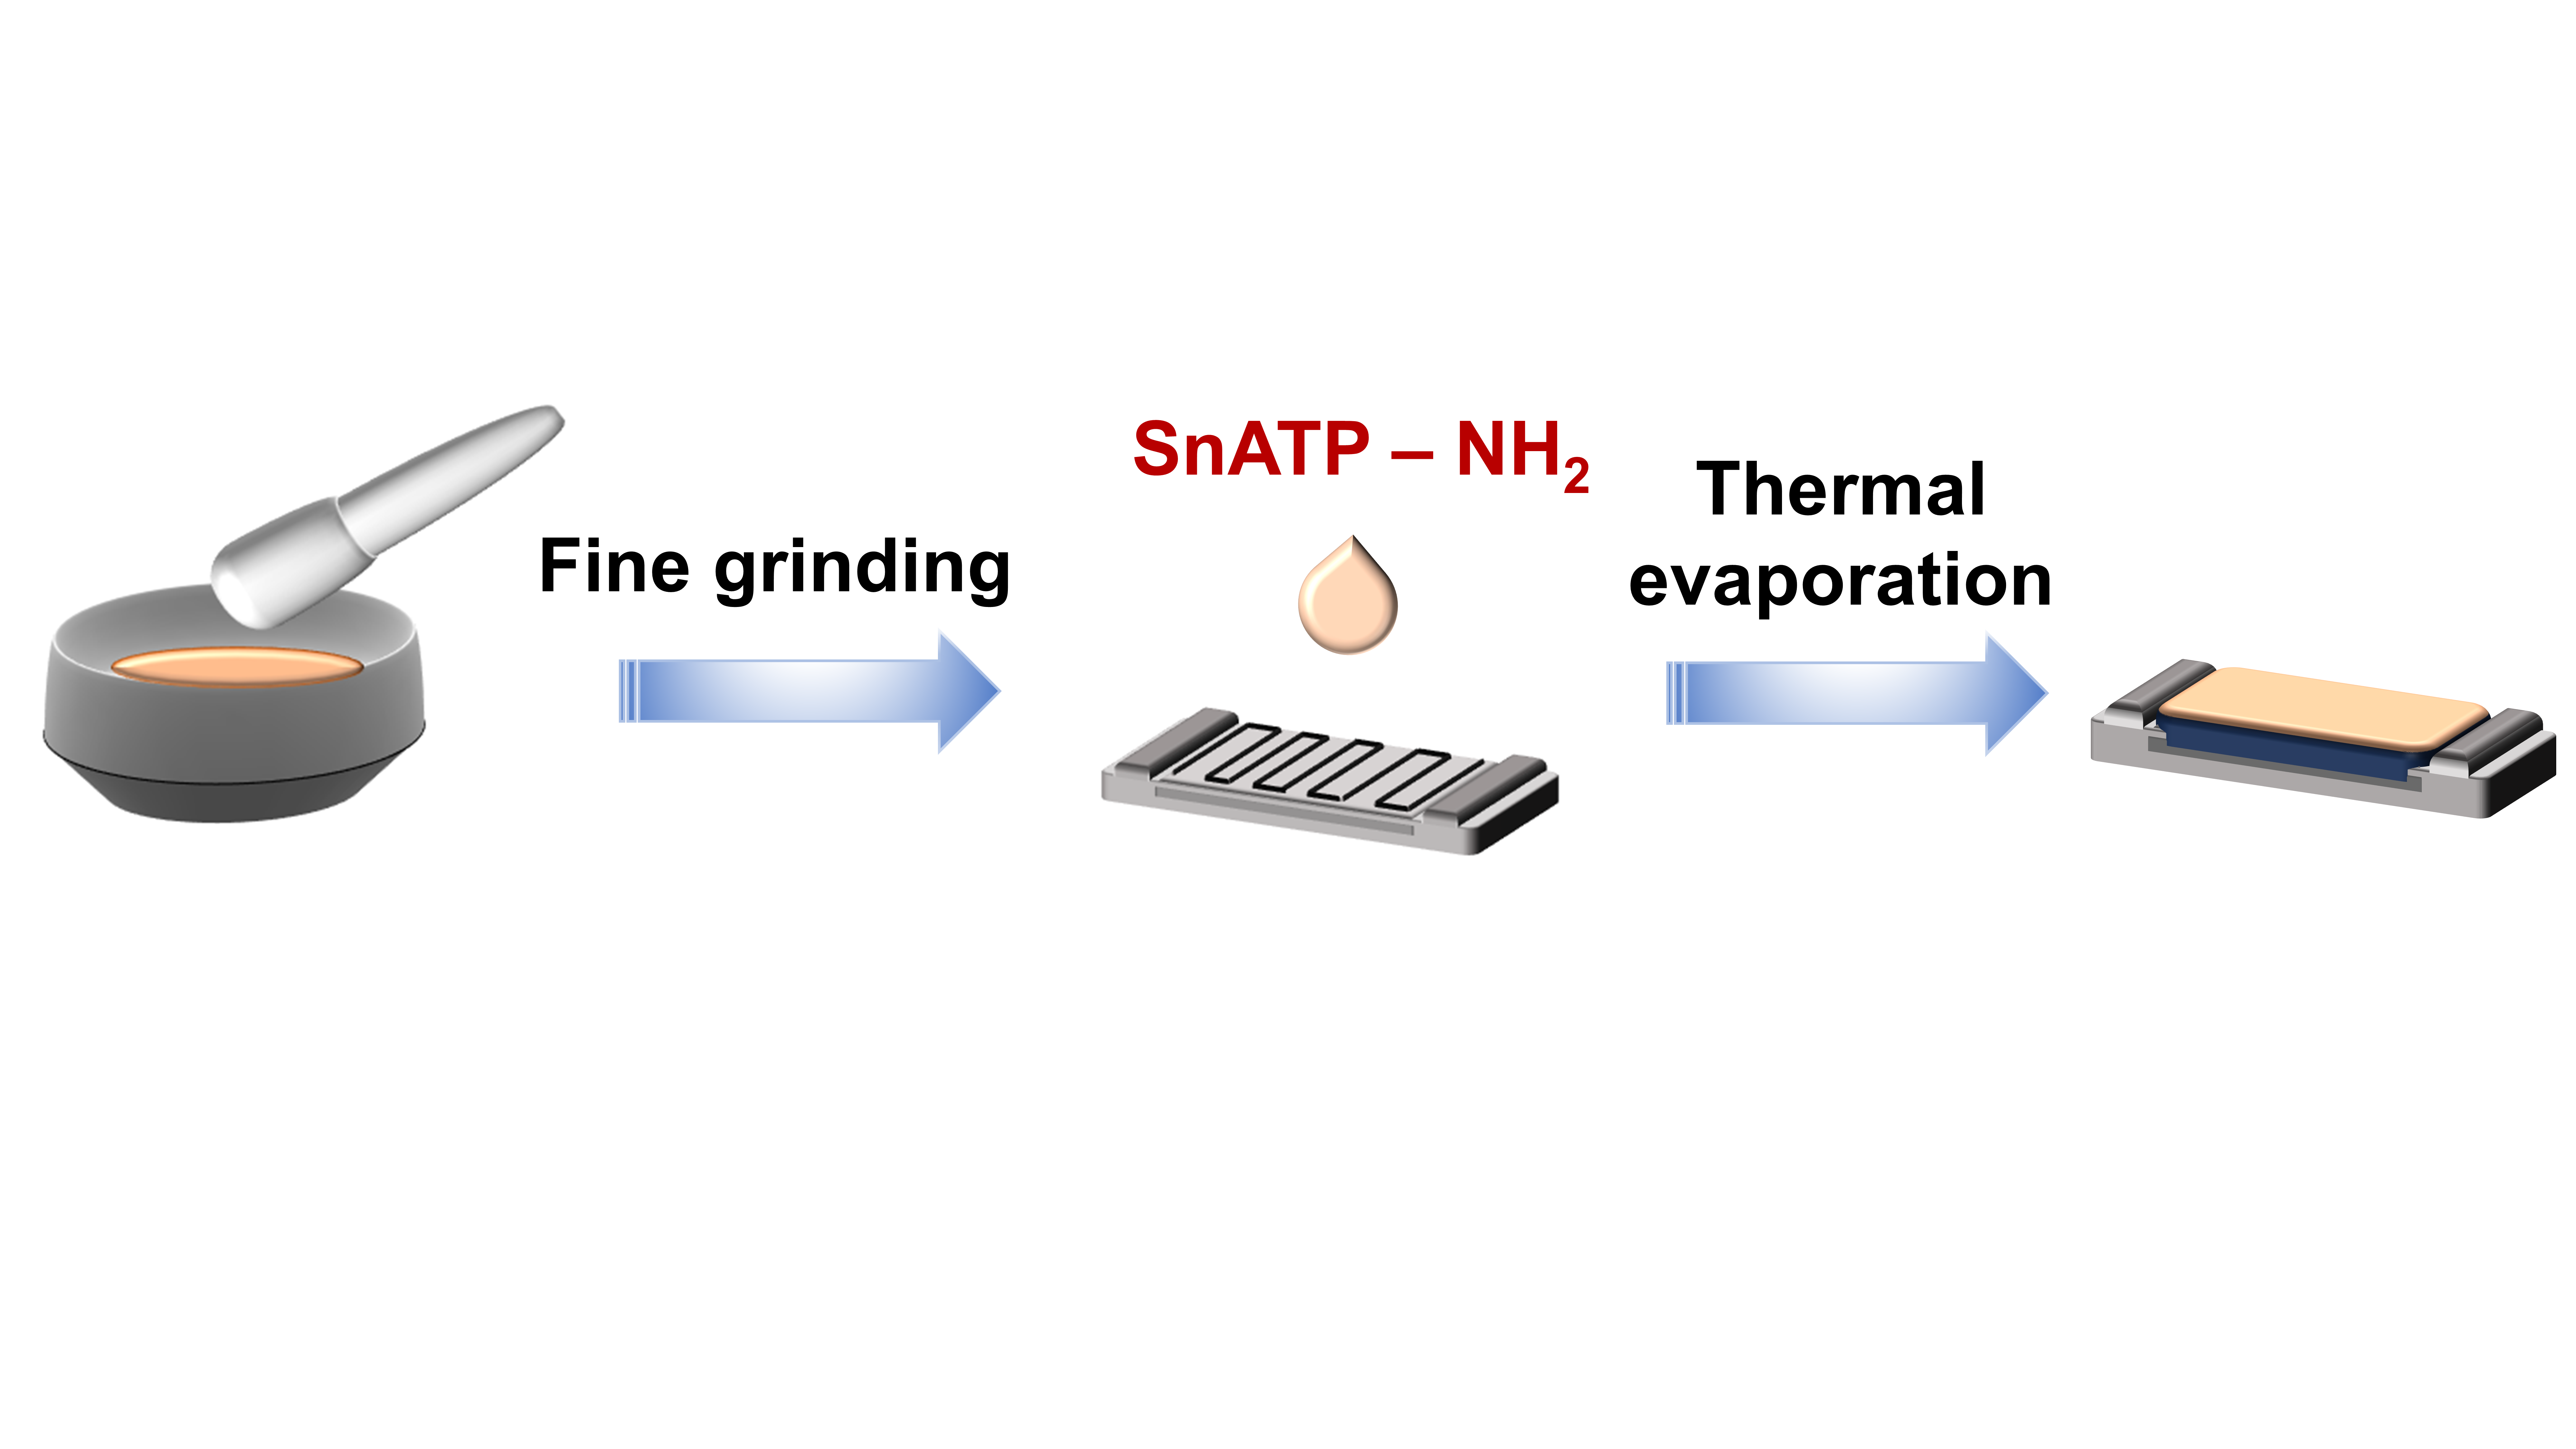


**Figure S15.** Fabrication process of the SnATP-NH2 based sensor.


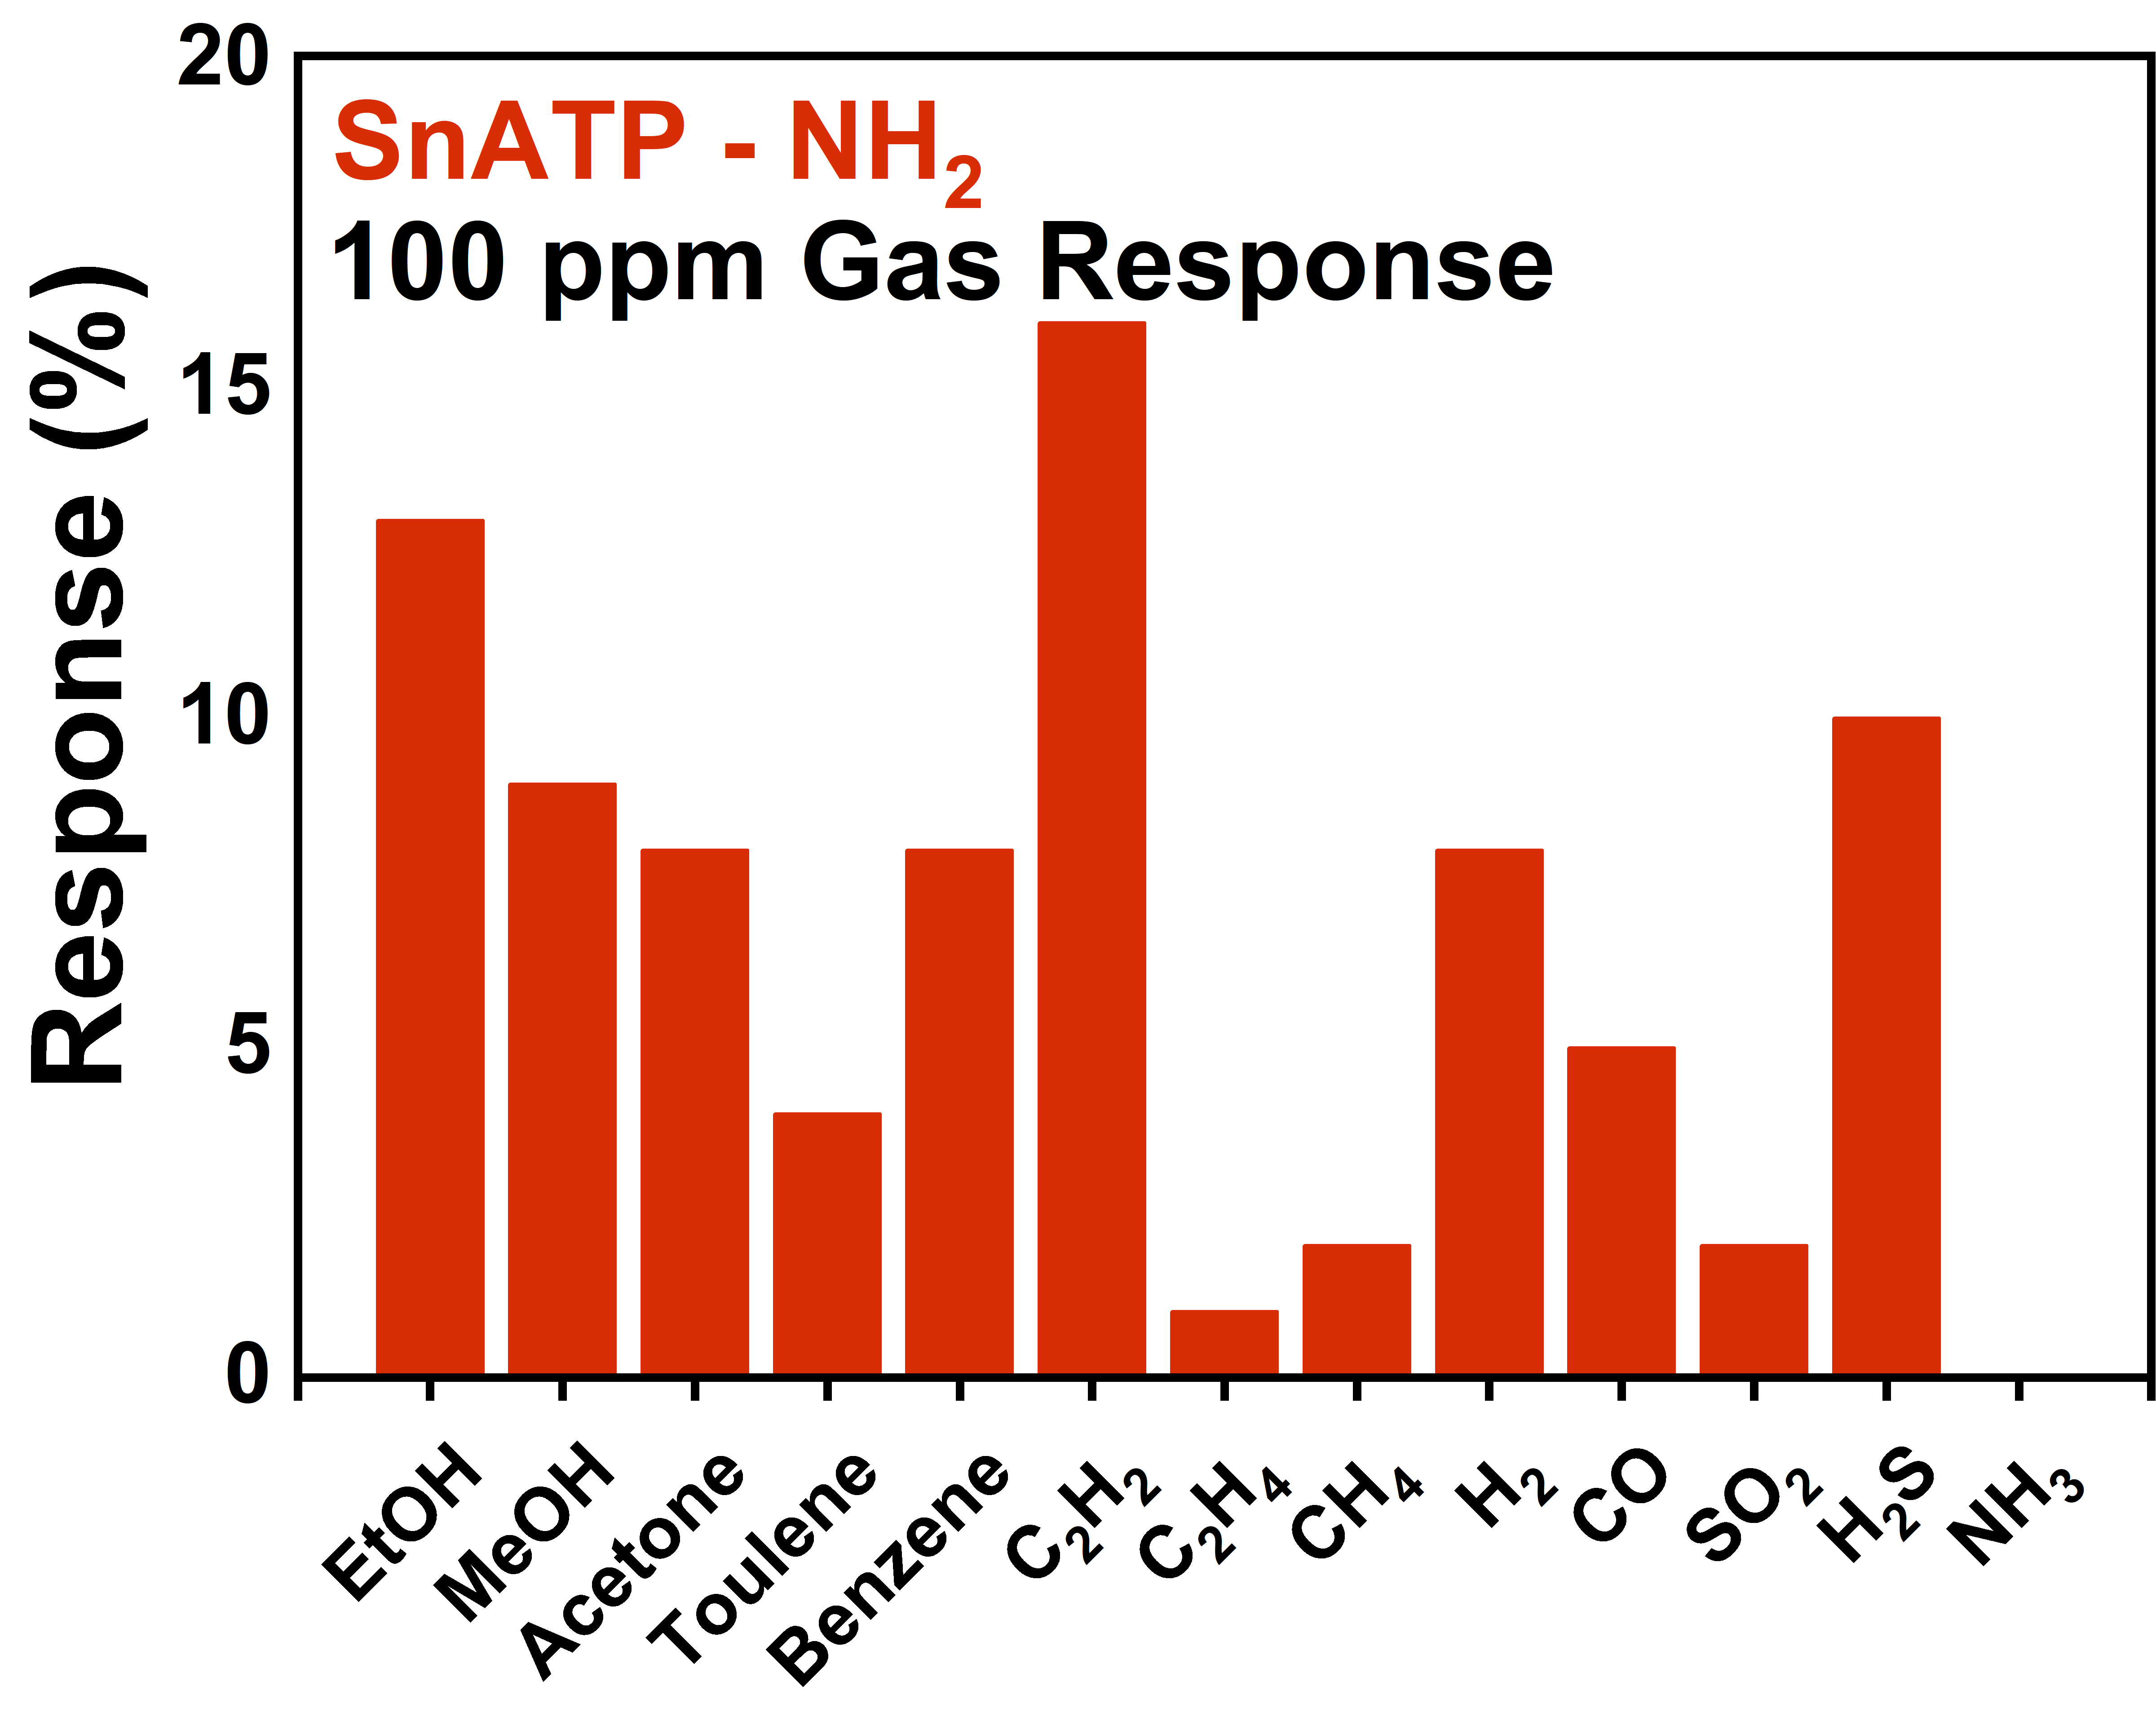


**Figure S16.** Cross-sensitivities of SnATP-NH2 molecular-based material towards 13 types of gases.

**
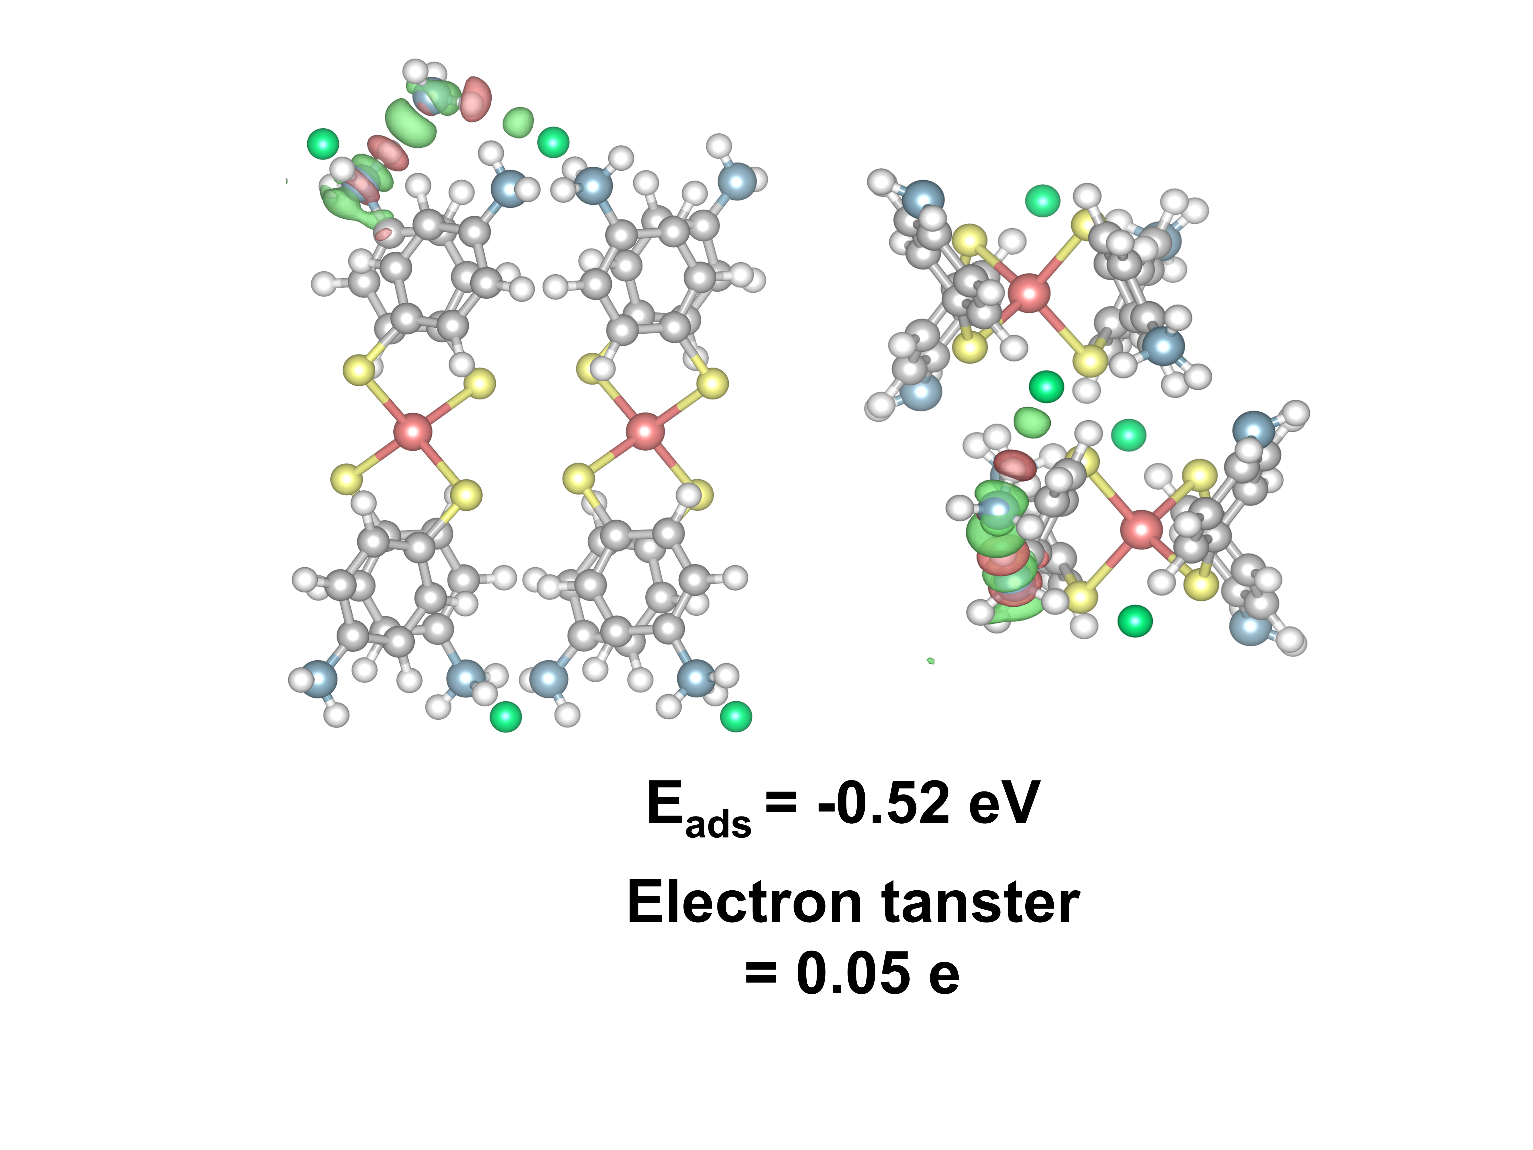
**

**Figure S17.** DFT calculation of NH3 adsorption on the zero-dimensional molecular material SnATP-NH3+.

**S3 Supporting Tables**

**Table S1.** Crystallographic data for SnATP-NH3+.

| Chemical formula | SnC24H26Cl2N4S4 |
| --- | --- |
| Formula weight | 686.32 |
| Temperature | 100 K |
| Crystal system | Monoclinic |
| Space group | *C2/c* |
| Cell parameters | *a* = 31.07 Å, *b* = 7.88 Å, *c* = 11.64 Å |
| Cell volume | *α* = 90°, *β* = 96.94°, *γ* = 90°, V = 2831.12 Å3 |
| *ρ*calc | 0.555 g cm-3 |
| *F* (000) | 1384 |
| *Z* | 4 |
| Index ranges | –38 ≤ h ≤ 38, –9 ≤ k ≤ 19, –14 ≤ l ≤ 14 |
| Reflections collected | 8829 |
| Independent reflections | 2804 |
| Completeness | 99.93% |
| Solution method | Superflip |
| Refinement method | Full-matrix least-square on *F2* in Jana2020 |
| GOF on *F2* | 1.115 |
| Final R indexes [I>=2σ (I)] | *R1* = 0.0235, *wR2* = 0.0700 |
| Final R indexes [all data] | *R1* = 0.0236, *wR2* = 0.0701 |

*aR*1 *=* Σ*||F*0 *|–|F*c*||* / Σ *|F*0 *|*;*b wR*2 *=* [Σ*w*(*F*02*–F*c2)2 / Σ*w*(*F*02)2]1/2

**Table S2.** Crystallographic data for SnATP-NH2

| Chemical formula | SnC24H24N4S4 |
| --- | --- |
| Formula weight | 615.46 |
| Temperature | 100 K |
| Crystal system | Monoclinic |
| Space group | *P21/m* |
| Cell parameters | *a* = 8.77 Å, *b* = 15.21 Å, *c* = 9.08 Å |
| Cell volume | *α* = 90°, *β* = 93.82°, *γ* = 90° V = 1208.78Å3 |
| *ρ*calc | 2.835 g cm-3 |
| *F* (000) | 620 |
| *Z* | 2 |
| Index ranges | –7 ≤ *h* ≤ 10, –18 ≤ *k* ≤ 18, –11 ≤ *l* ≤ 10 |
| Reflections collected | 2509 |
| Independent reflections | 2371 |
| Completeness | 99.56% |
| Solution method | Superflip |
| Refinement method | Full-matrix least-square on *F2* in Jana2020 |
| GOF on *F2* | 1.180 |
| Final R indexes [I>=2σ (I)] | *R1* = 0.0526, *wR2* = 0.1449 |
| Final R indexes [all data] | *R1* = 0.0538, *wR2* = 0.1454 |

*aR*1 *=* Σ*||F*0 *|–|F*c*||* / Σ *|F*0 *|*;*b wR*2 *=* [Σ*w*(*F*02*–F*c2)2 / Σ*w*(*F*02)2]1/2

**Table S3.** Sensing performance of the no-light irradiation material-based RT chemiresistive NH3 sensors.

|  | Sensinng material | LOD(ppm) | Response  (10 ppm) | Response time. | Ref. in main text |
| --- | --- | --- | --- | --- | --- |
| CPs  Materials | SnATP-NH3+ | 0.042 | 5416% | 174 s @ 10 ppm | This work |
| MTCP | 0.25 | 100% | 600 s @ 10 ppm | 12 |
| Cu-HHTP 2D  thin film | 0.5 | 75% | 96 s @ 100 ppm | 13 |
| Cu3(HHTP)2 | 0.5 | 70 | 90s @ 100 ppm | 14 |
| Cu-HHTP 3D  thin film | 8.7×10-5 | 60.5% | 35 s @ 100 ppm | 13 |
| BiHHTP | n.d. | 46% | 900 @ 10 ppm | 15 |
| ZnTDA | 1 | 41% | 133 @ 10 ppm | 16 |
| NiPc-Ni | 0.05 | 23% | 1800 s @ 10 ppm | 17 |
| NiPc-Cu | 0.16 | 13% | 1800 s @ 10 ppm | 17 |
| CoTDA | 1 | 10% | 34 @ 10 ppm | 16 |
| CuTz1 | 0.23 | 5% | 30 s @ 10 ppm | 18 |
| Cu3(HHTP)-THQ | 0.35 | 4.5% | 180 s @ 10 ppm | 19 |
| Cu-BHT | 0.21 | 4 | 58 s @ 20 ppm | 20 |
| RE-fcu-MOF | 0.23 | 4% | 50 @ 20 ppm | 21 |
| Cu3(HITP)2 | 0.5 | 2.5% | n.d. | 22 |
| CuTCNQF4 | 10 | 0.2% | 300 s @ 10 ppm | 23 |
| Sulfide Materials | In2S3 | 10 | 15% | 84 s @ 10 ppm | 24 |
| MnPS3 | 0.05 | 11% | n.d. | 25 |
| MoS2 film | 0.12 | 10% | 54 s @ 0.5 ppm | 26 |
| Oxide Materials | Coral-shaped Dy2O3 | 0.1 | 200% | 17.4 s @ 50 ppm | 27 |
| MnO2 nanofibers | 1 | 4% | 150 s @ 60 ppm | 28 |
| Polymer Materials | COF-5  nanosheets | 0.2 | 246% | n.d. | 29 |
| Polyaniline | 1 | 227% | 120 s @ 10 ppm | 30 |
| pDPPBu-BT | 0.01 | 47% | n.d. | 31 |
| PEDOT  nanorods | 10 | 6% | 10 s @ 10 ppm | 32 |
| PEDOT film | 10 | 4% | 10 s @ 10 ppm | 32 |
| q2D PANI | 0.03 | 2.5% | n.d. | 33 |
| Carbon based Materials | Modified SWCNT | 0.1 | 18% | 300 s @ 10 ppm | 34 |
| Graphene nanomesh | 0.16 | 11% | 300 s @ 10 ppm | 35 |
| Activated carbons | 10 | 7% | 2700 s @ 10 ppm | 36 |
